1            Specification of axial identity by *Hoxa2* distinguishes between a  
2 phenotypic and molecular ground state in mouse cranial neural crest cells

3

4 Irina Pushel<sup>1</sup>, Paul A Trainor<sup>1,2</sup>, Robb Krumlauf<sup>1,2\*</sup>

5            1. Stowers Institute for Medical Research, Kansas City, MO 64110, USA

6            2. Department of Anatomy and Cell Biology, University of Kansas Medical Center, Kansas  
7            City, KS 66160, USA

8            \*corresponding author, [rek@stowers.org](mailto:rek@stowers.org)

9

10 **Abstract**

11            *Hox* genes play a key role in head formation by specifying the axial identity of neural  
12 crest cells (NCCs) migrating into embryonic pharyngeal arches. In the absence of *Hoxa2*, NCC  
13 derivatives of the second pharyngeal arch (PA2) undergo a homeotic transformation and  
14 duplicate structures formed by first arch (PA1) NCCs. Current models postulate that PA1  
15 represents a NCC ‘ground state’ and loss of *Hoxa2* causes a reversion of PA2 NCCs to the PA1  
16 ‘ground state’. We use bulk and single-cell RNAseq to investigate the molecular mechanisms  
17 driving this phenotypic transformation in the mouse. In *Hoxa2*<sup>-/-</sup> mutants, PA2 NCCs generally  
18 maintain expression of the PA2 transcriptional signature and fail to strongly upregulate a PA1  
19 transcriptional signature. Our analyses identify putative HOXA2 targets and suggest that  
20 subsets of NCCs may respond to HOXA2 activity in distinct manners. This separation of  
21 phenotypic and molecular states has significant implications for understanding craniofacial  
22 development.

## 23 **Introduction**

24           Neural crest cells (NCCs) represent one of the defining traits in the evolution of  
25 vertebrates (Sauka-Spengler et al. 2007; Green et al. 2015). The neural crest is a transient  
26 population of cells that arises along the anterior-posterior axis of the developing central  
27 nervous system (Knecht and Bronner-Fraser 2002). NCCs delaminate from the neural  
28 epithelium and migrate into the periphery of vertebrate embryos. These migratory and  
29 proliferative cells are multipotent and play a dynamic role in vertebrate development, giving  
30 rise to diverse structures including neurons, glia, pigment cells, and craniofacial bone and  
31 cartilage (LaBonne and Bronner-Fraser 1998; Le Douarin and Kalcheim 1999; Minoux and Rijli  
32 2010). They are divided into trunk and cranial NCCs: trunk NCCs primarily contribute to the  
33 peripheral nervous system, while cranial NCCs also give rise to most of the bone and connective  
34 tissue of the head and play a key role in craniofacial morphogenesis.

35           The establishment of cranial NCCs is thought to have been an important step in  
36 evolution of the vertebrate head (Northcutt and Gans 1983; Parker et al. 2016; Square et al.  
37 2017). Mutations in genes important for cranial NCC development have been shown to play a  
38 role in human craniofacial defects and disorders, making a deeper understanding of NCC  
39 development a relevant area of clinical study (Crane and Trainor 2006; Terrazas et al. 2017;  
40 Etchevers et al. 2019). Cranial NCCs are initially specified at the neural plate border region,  
41 together with neural precursors (LaBonne and Bronner-Fraser 1999; Le Douarin and Kalcheim  
42 1999; Knecht and Bronner-Fraser 2002). The NCCs then delaminate from the dorsal neural tube  
43 and migrate into the frontonasal prominence and pharyngeal arches (PAs), highly conserved  
44 transient embryonic structures that form the oral apparatus which is essential for feeding and  
45 breathing. Upon arrival at their destination, NCCs differentiate into the derivative structures  
46 that shape the vertebrate head (Couly et al. 1993)(Fig. 1A,B). NCCs give rise to unique  
47 structures based on their axial level of origin (Kontges and Lumsden 1996). For instance, the  
48 NCCs migrating into the first PA (PA1) contribute to the maxillary and mandibular components  
49 of the jaw, Meckel's cartilage, and the incus and malleus of the middle ear, while the NCCs  
50 migrating into the second PA (PA2) form the stapes of the middle ear and the hyoid bone in the  
51 neck (Le Douarin and Kalcheim 1999; Minoux and Rijli 2010).

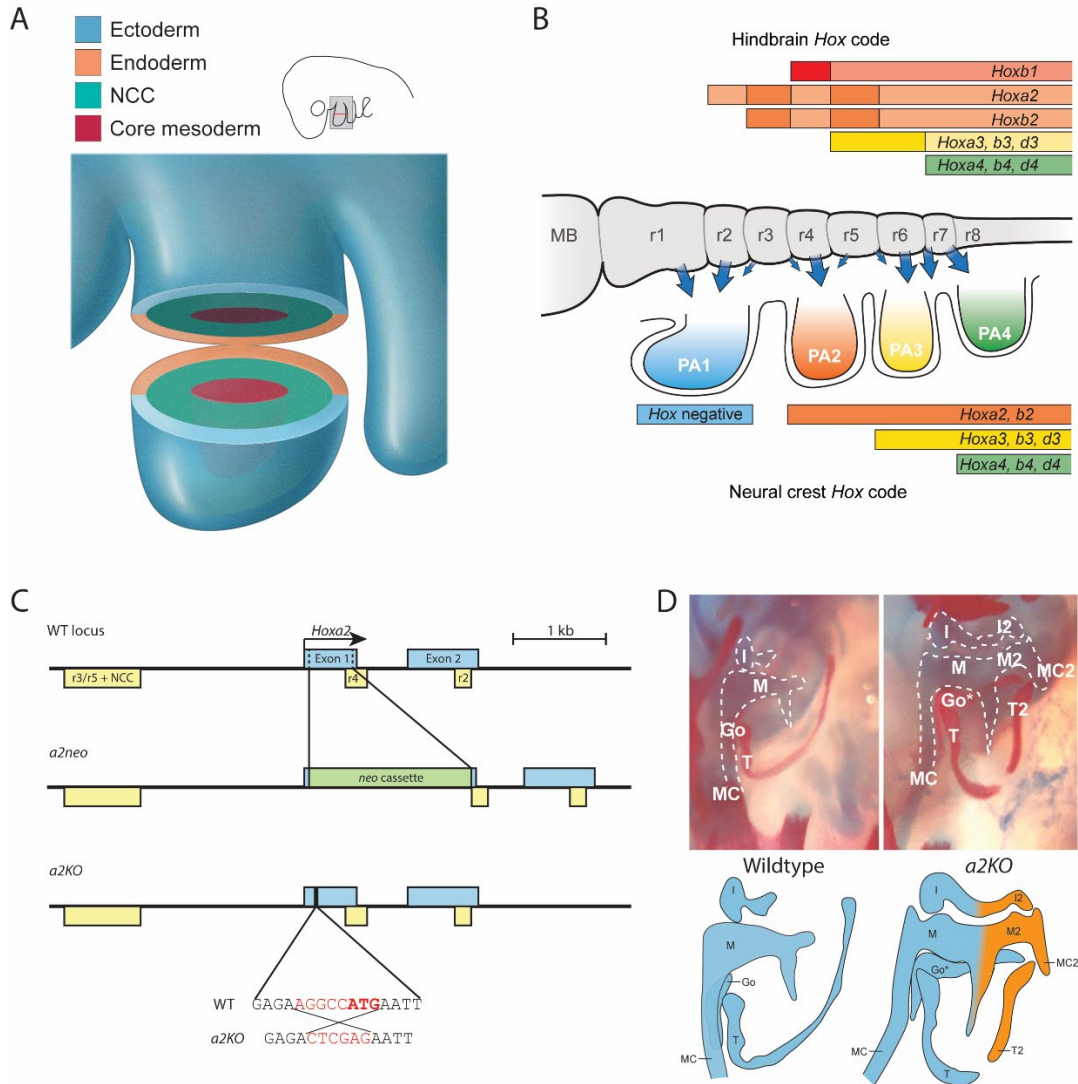

52

53 **Figure 1.** *Hox* genes in the PAs and phenotypic effects of *Hoxa2* knockout. A) NCCs migrate into  
 54 the PAs surrounding a mesodermal core, contained within the ectoderm and endoderm  
 55 surrounding the PA structure. Schematic corresponds to ~E9.0-E9.5 mouse embryo. B) *Hox*  
 56 genes are expressed in a nested pattern that affects NCC fate prior to delamination and  
 57 migration (hindbrain code, top) and a distinct pattern once the cells have populated the PAs  
 58 (neural crest code, bottom). Figure adapted from (Parker et al. 2018). C) A comparison of the  
 59 WT *Hoxa2* locus to the *a2neo* and *a2KO* alleles. Exons depicted in blue, enhancers in yellow.  
 60 Bottom depicts 7-bp change (highlighted in red) between WT and *a2KO* alleles. Start codon  
 61 (ATG) bold. D) Comparison of middle ear skeletal staining at E18.5 between embryos that are  
 62 WT and homozygous for the *a2KO* allele. Cartilagenous structures outlined with white dashed  
 63 line for clarity. Schematics show PA1-derived structures in blue and PA2-derived structures in  
 64 orange. M=malleus, I=incus, MC=Meckel's cartilage, T=Tympanic bone, Go=gonial bone.  
 65 Duplicated structures designated with a 2 (M2, I2, MC2, T2); Go\*=transformed gonial bone.

66           The highly conserved family of HOX transcription factors plays a key role in establishing  
67 regional identities in diverse tissues throughout animal development (Carroll 1995; Alexander  
68 et al. 2009; Mallo et al. 2010). During vertebrate head development, the expression and  
69 function of *Hox* genes are tightly coupled with the specification of axial identity in hindbrain  
70 segments and cranial NCCs (Hunt et al. 1991; Couly et al. 1998; Trainor and Krumlauf 2000b;  
71 Trainor and Krumlauf 2001; Minoux and Rijli 2010; Parker et al. 2018). In the developing mouse  
72 embryo, NCCs express *Hox* genes in two general phases during their development: prior to their  
73 delamination from the neural tube (the ‘hindbrain *Hox* code’) and after they begin migrating  
74 into the PAs (the ‘neural crest *Hox* code’) (Fig 1B). This establishes a colinear nested expression  
75 pattern of *Hox* genes in the PAs: PA1 NCCs lack *Hox* expression, PA2 NCCs express *Hoxa2* and  
76 *Hoxb2*, PA3 NCCs express *Hoxa2*, *Hoxb2*, *Hoxa3*, *Hoxb3*, and *Hoxd3*, and so on into more  
77 posterior arches (Hunt et al. 1991; Minoux and Rijli 2010; Parker et al. 2018). This generates a  
78 combinatorial *Hox* code that underlies the establishment of unique axial identities of each PA  
79 (Trainor and Krumlauf 2001).

80           Whether *Hox* codes are first established in the hindbrain and transferred into the  
81 periphery by migrating NCCs or initiated independently in NCCs separate from the hindbrain  
82 *Hox* code is not well understood. Regulatory studies have generated evidence for both  
83 independent and shared regulation of *Hoxa2* and *Hoxb2* genes in hindbrain segments and  
84 cranial NCCs (Maconochie et al. 1997; Maconochie et al. 1999; McEllin et al. 2016; Parker et al.  
85 2019). Heterotopic grafting experiments in zebrafish and mouse embryos have revealed that  
86 *Hox* expression in NCCs is not permanently fixed and is influenced by signals from the PA  
87 environment (Trainor and Krumlauf 2000a; Trainor and Krumlauf 2000b; Schilling et al. 2001).  
88 This suggests there is dynamic regulation of *Hox* expression during NCC formation and  
89 migration in the PAs. However, it remains unclear whether the NCC *Hox* code acts in parallel to  
90 or directly within the emerging framework for the conserved core gene regulatory network  
91 governing NCC development (Gammill and Bronner-Fraser 2002; Simoes-Costa and Bronner  
92 2015; Martik and Bronner 2017; Parker et al. 2018; Martik et al. 2019).

93           Loss and gain of function experiments of the *Hox* genes in a number of vertebrate  
94 species have led to the formulation of a NCC ground state model for axial patterning of the PAs

95 during embryonic development. In this model, NCCs migrating into the PAs share a common  
96 default patterning program, or ground state, that is modified by combinations of *Hox* gene  
97 expression to produce distinct derivatives at each axial level (Couly et al. 1998; Minoux and Rijli  
98 2010; Vieux-Rochas et al. 2013). Since NCCs in PA1 lack *Hox* expression, they are postulated to  
99 represent the ground state. This hypothesis is largely based on phenotypes associated with  
100 perturbation of *Hoxa2* expression. In mouse *Hoxa2*<sup>-/-</sup> mutants, PA2-derived skeletal structures  
101 display homeotic transformations and duplicate PA1-derived structures (Gendron-Maguire et  
102 al. 1993; Rijli et al. 1993). Conversely, ectopic expression of *Hoxa2* in PA1 NCCs results in  
103 transformation of PA1-derived skeletal structures to duplicate PA2 derivatives (Kitazawa et al.  
104 2015). This functional role for *Hoxa2* in patterning PA identity has also been observed in other  
105 vertebrate species (Grammatopoulos et al. 2000; Pasqualetti et al. 2000; Hunter and Prince  
106 2002). Together, this evidence supports a conserved role for *Hoxa2* as a master regulator or  
107 selector gene that modifies the *Hox*-free NCC ground state to impart a PA2 identity on the NCCs  
108 colonizing PA2. However, the precise timing of this *Hoxa2*-dependent process remains  
109 unknown, as do the cell populations and downstream target genes through which *Hoxa2* acts to  
110 regulate regional identity. There is evidence of a continued requirement for *Hoxa2* activity in  
111 NCCs during differentiation (Santagati et al. 2005), but an earlier role for its input into  
112 programming the cranial NCCs remains unclear.

113 In addition to the specific perturbation of *Hoxa2* expression, deletion of the entire *HoxA*  
114 cluster in the mouse results in PAs 2-4 all producing additional PA1-like structures in lieu of  
115 caudal derivatives. This further supports the existence of a *Hox*-free ground state that is  
116 transformed in each of the PAs by distinct combinations of *Hox* gene expression (Minoux et al.  
117 2009). It is clear from the phenotypic transformations observed in mutant embryos that there  
118 exists a phenotypic NCC ground state represented by the set of NCC derivatives produced in the  
119 absence of *Hox* gene expression. Whether this phenotypic ground state is accompanied by a  
120 shared molecular ground state – a transcriptional signature – that corresponds to *Hox*-free  
121 NCCs and is observed in *Hox* mutant embryos, has not yet been addressed. Where the term  
122 ‘ground state’ has been used to date, the explicit distinction between a phenotypic and  
123 molecular ground state has not been made (Rijli et al. 1993; Minoux et al. 2009; Amin et al.

124 2015). This is an important issue to resolve for understanding regulatory mechanisms that  
125 pattern craniofacial development, because *Hoxa2* could be working to modify the properties of  
126 all NCCs in PA2 or only sub-populations of cells required for specifying PA2 derived structures.  
127 Regardless of the process, *Hoxa2* clearly has a fundamental effect in determining PA2 identity.

128         Recent advances in sequencing technologies enable us to more thoroughly explore the  
129 molecular underpinnings of axial specification and distinguish between phenotypic and  
130 transcriptional effects at single-cell resolution. Several studies have provided comparative  
131 analysis of gene expression in the PAs (Brunskill et al. 2014; Lumb et al. 2017; Minoux et al.  
132 2017). However, these comparisons have not yet been extended to *Hox* mutant embryos, and  
133 thus lack the power to determine whether a *Hox*-free mutant PA (other than PA1) reverts not  
134 only at the phenotypic level but also at the molecular or transcriptional level to a PA1-like state.  
135 Thus, elucidating the molecular mechanism by which *Hoxa2* expression acts to impart a PA2  
136 NCC fate directly informs our understanding of the transcriptional basis of axial identity  
137 specification in the developing mouse embryo.

138         In this study, to deepen our understanding of the role of *Hoxa2* in regulating PA2  
139 identity, we have used bulk and single cell RNAseq in mice, comparing wildtype (WT) and *Hoxa2*  
140 mutant embryos, to investigate the precise timing and populations of cells where it exerts its  
141 regulatory activity on NCCs. Strikingly, our data do not show a global reversion of the *Hoxa2*<sup>-/-</sup>  
142 PA2 transcriptional profile in NCCs to a PA1-like state, as would be expected in the presence of  
143 a molecular NCC ground state. Rather, we find evidence that *Hoxa2* exerts its regulatory activity  
144 in distinct subpopulations of cells in PA2 as NCCs are undergoing differentiation. Using  
145 differential expression analyses from transcriptional profiling of cell populations and single  
146 cells, we identified both previously described and novel putative targets of *Hoxa2* involved in  
147 PA2 fate specification. Taken together, our data suggest that the phenotypic ground state of  
148 mouse cranial NCCs is not matched with an underlying molecular ground state and reveal novel  
149 downstream targets of *Hoxa2* involved in axial identity specification. Our findings highlight the  
150 value of scRNA-seq in evaluating and refining models surrounding the molecular basis of  
151 developmental and evolutionary phenotypes. Moreover, the rich transcriptomic datasets

152 generated in this study are a valuable resource to further characterize the molecular  
153 underpinnings of NCC axial identity.

154

155



## 156 Results

### 157 Generation of a new mouse *Hoxa2* null allele

158 In order to investigate the molecular mechanisms by which *Hoxa2* expression drives PA2  
159 fate, we used a strategy based on transcriptional profiling approaches to compare wildtype  
160 (WT) and *Hoxa2* mutant mouse embryos. Existing mouse lines have mutations with a *neomycin*  
161 cassette inserted into *Hoxa2* (Gendron-Maguire et al. 1993; Rijli et al. 1993), which may alter  
162 the expression of neighboring *Hox* genes, as we know this is a region rich in regulatory  
163 elements both within and flanking the gene (Tümpel et al. 2006) (Fig. 1C). These lines also exist  
164 on a mixed genetic background and we wanted to minimize noise in genomic comparisons by  
165 performing analyses in a consistent background. In addition, we wanted to be able to monitor  
166 endogenous *Hoxa2* mRNA expression in cells lacking functional HOXA2 protein. To do this, we  
167 generated a novel null allele by using CRISPR-Cas9 gene editing to alter a 7 bp region in the  
168 endogenous locus which includes part of HOXA2 start codon, deleting 2 bp and converting it  
169 into an *XhoI* site (5'-AGGCCATG-3' to 5'-CTCGAG-3'). We refer to this allele as *a2KO*, which  
170 minimizes changes to the locus and preserves all known *cis*-regulatory elements (Fig. 1C).

171 To validate the successful abrogation of HOXA2 protein function by this mutation, we  
172 compared homozygous *a2KO* embryos to a previously characterized mutant containing the  
173 *neomycin* cassette (Rijli et al. 1993) (Fig. 1C-D). We refer to this published allele as the *a2neo*.  
174 As with pups homozygous for *a2neo*, homozygous *a2KO* pups die within 24 hours of birth and  
175 display the previously characterized 'cauliflower ear' phenotype. Importantly, *a2KO* embryos  
176 also show the same duplication of PA1-derived middle ear elements that is characteristic of the  
177 *a2neo* embryos at E18.5 (Fig. 1D). It is interesting to note that *a2KO* embryos do not show the  
178 cleft palate defect originally observed in *a2neo* mice (Rijli et al. 1993). Our *a2neo* colony also  
179 lacks cleft palate, and a complementation test intercrossing *a2KO* and *a2neo* heterozygous  
180 alleles also fails to recapitulate the cleft palate phenotype. These observations may be due to  
181 differences in genetic background or an off-target effect of the *neomycin* cassette disrupting  
182 expression of other genes in the *HoxA* cluster. Homozygous embryos with *a2KO* or *a2neo* alleles



183 show matching phenotypes with respect to PA2 derived structures and affected tissues,  
184 rendering the *a2KO* allele a valid genetic model for studying *Hoxa2* function in NCCs.

185

### 186 PA1 and PA2 have distinct molecular states early in NCC migration

187 The 'ground state' model considers that *Hoxa2* is a selector gene for PA2 fate, modifying  
188 the *Hox*-free ground state observed in PA1 (Fig. 1B). Thus, we wanted to understand when  
189 differences appear in the transcriptional profiles of NCCs from PA1 and PA2 during  
190 development and when HOXA2 acts to modify the putative ground state to specify PA2 fates.  
191 To address these questions, we dissected PA1 and PA2 from wildtype (WT) and homozygous  
192 *a2KO* mutant embryos at four timepoints, ranging from early NCC migration (E9.0) to the start  
193 of differentiation (E10.5), and examined their transcriptional profiles by bulk RNAseq  
194 (bRNAseq). While NCCs represent the majority of cells in the dissected PA tissue, the arches  
195 also contain cells from the surface ectodermal and endodermal layers and a core of  
196 mesodermal cells (Fig. 1A). We utilized the entire PA tissue for these experiments to avoid  
197 inducing changes in cell properties during manipulations or finer level dissections and to ensure  
198 we had the full cellular repertoire of components of the PAs.

199 We first examined when molecular differences between PA1 and PA2 appear during  
200 NCC migration and early differentiation by performing differential gene expression analysis  
201 (Supplementary Tables S1-5). If early NCCs migrating into the PAs have a common ground state  
202 that is progressively modified in PA2 by HOXA2, their initial transcriptional profiles in PA1 and  
203 PA2 would be predicted to be quite similar, with differences emerging and becoming more  
204 pronounced as HOXA2 exerts its activity during the course of NCC colonization of the PAs. Our  
205 data reveal that early in migration at E9.0, PA1 and PA2 already display significantly different  
206 transcriptional profiles and this pattern persists through E9.5 (Fig. 2A), arguing against a  
207 common molecular ground state early in the developmental process. Then as the embryo  
208 continues to develop from E10.0-E10.5, at the onset of NCC differentiation, we observe  
209 progressively fewer differences between PA1 and PA2. The majority of the differentially  
210 expressed genes are unique to a particular timepoint, although 89 genes are PA-biased

211 throughout development and a fair number of genes are differentially expressed at both E9.0  
212 and E9.5, when we observe the greatest transcriptional differences between PA1 and PA2  
213 (Supplementary Fig. S1A-B).

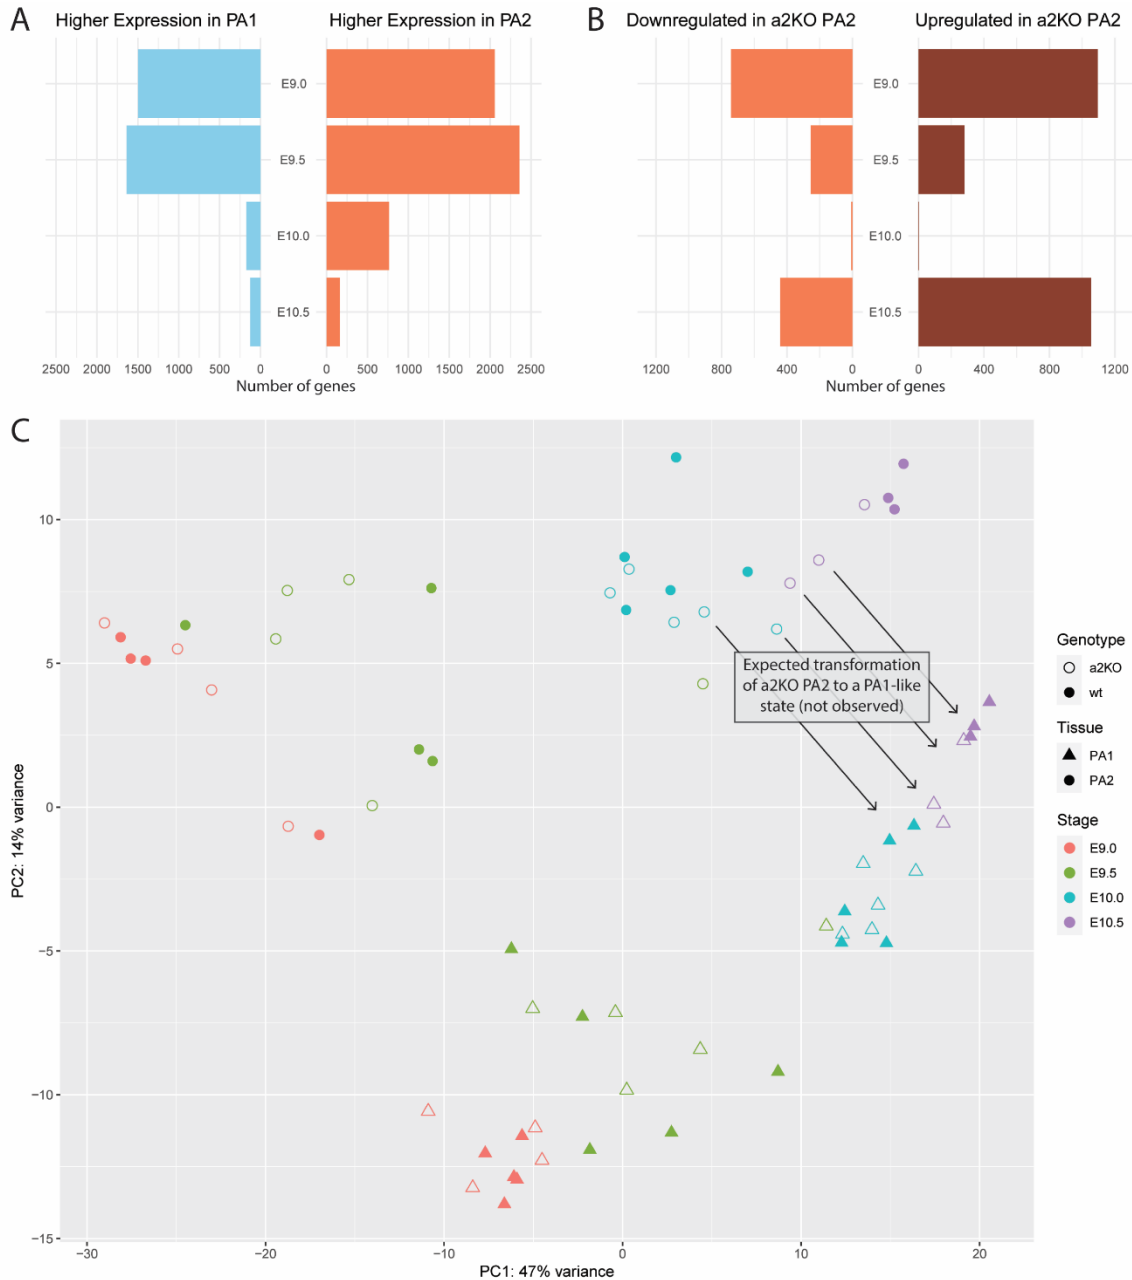

214

215 **Figure 2.** Hoxa2 knockout PA2 does not revert to a PA1-like transcriptional state. A) Number of  
 216 genes differentially expressed between WT PA1 and WT PA2 at each timepoint E9.0-E10.5. B)  
 217 Number of genes differentially expressed between WT PA2 and a2KO PA2 at each timepoint  
 218 E9.0-E10.5. C) Principal component analysis (PCA) plot depicting clustering of WT PA1, WT PA2,  
 219 a2KO PA1, and a2KO PA2 from E9.0-E10.5. Each point corresponds to a sample from an  
 220 individual embryo (PA1 and PA2 were both collected from each embryo). Color corresponds to  
 221 timepoint, shape corresponds to tissue, fill corresponds to genotype. All samples cluster  
 222 according to PA of origin, with PA2 in upper left of the plot and PA1 in lower right, independent  
 223 of genotype.

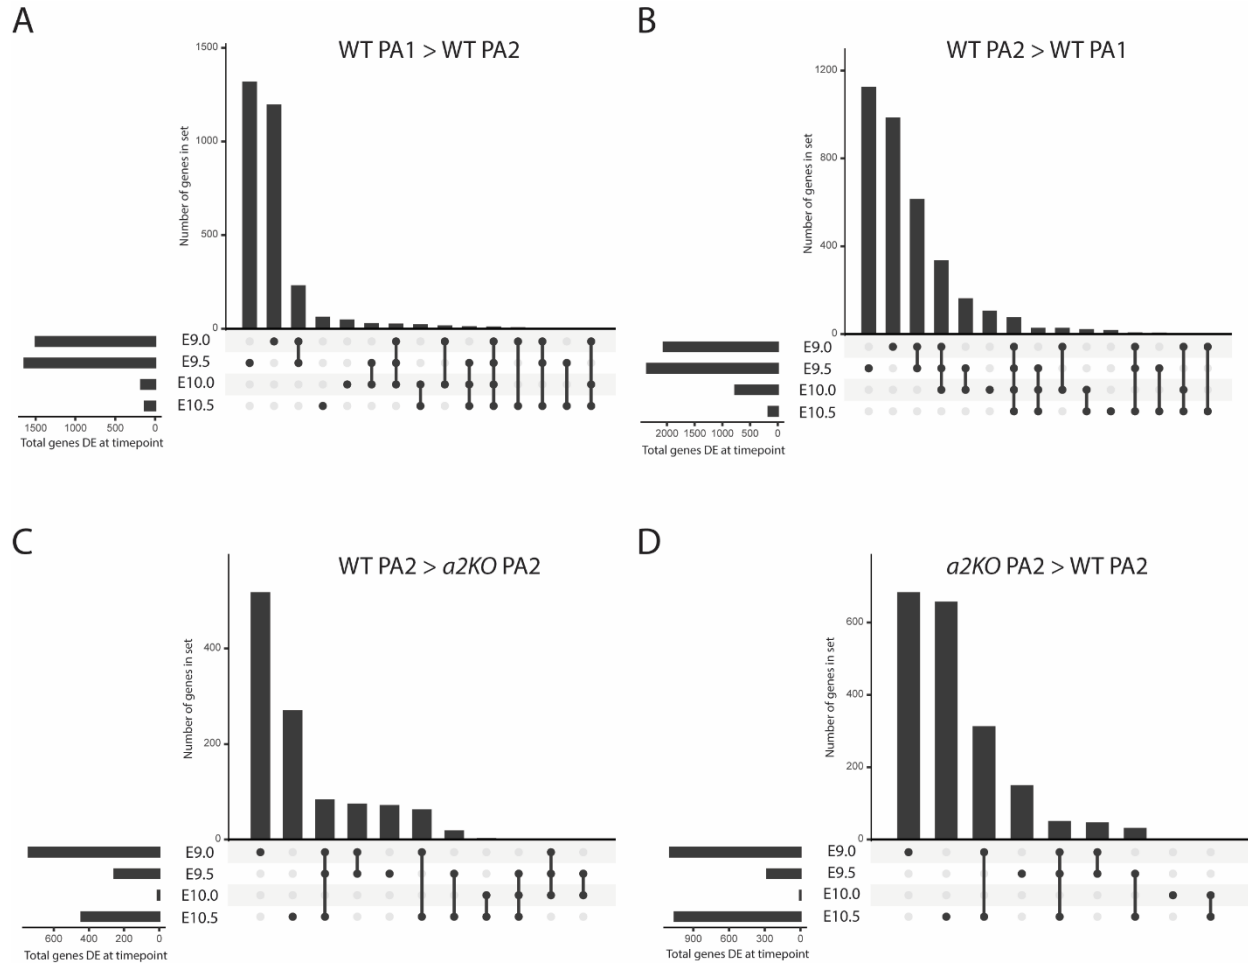

224

225 **Supplementary Figure S1.** UpSet plots depicting differentially expressed genes across  
226 timepoints in bRNAseq dataset. UpSet plots depict overlapping data in a clearer format than  
227 Venn diagrams. Each timepoint is listed at the left, with dots (connected by lines) showing the  
228 datasets that a given group of genes (bar) belongs to. For further information on UpSet plots,  
229 refer to (Lex et al. 2014). A) Genes with higher expression in WT PA1 than WT PA2 at any  
230 timepoint. B) Genes with higher expression in WT PA2 than WT PA1 at any timepoint. C) Genes  
231 downregulated in PA2 in the absence of HOXA2. D) Genes upregulated in PA2 in the absence of  
232 HOXA2.

233

234 Overall, these data indicate that cranial NCCs emerging from the hindbrain at different  
235 axial levels have distinct transcriptional profiles as they begin to migrate into PA1 and PA2,  
236 suggesting that axial identities may already be established by early stages of NCC migration. The  
237 similarity of transcriptional profiles in both arches at later stages may reflect that NCCs are  
238 undergoing differentiation programs that generate a similar repertoire of cell types -  
239 osteoblasts, chondrocytes, neurons, glia, and melanocytes in each pharyngeal arch  
240 environment. These cells may exist in different proportions and end up in unique orientations  
241 relative to one another, ultimately resulting in distinct derivatives in PA1 and PA2, however the  
242 cell types forming these structures are similar.

243

#### 244 *Hoxa2* maintains the molecular character of PA2 in different phases of NCC development

245 To investigate how the loss of HOXA2 affects PA2 development, we compared the  
246 transcriptional profiles between PA2 of WT and *a2KO* embryos and identified genes  
247 differentially expressed during NCC migration and early differentiation (Fig. 2B and  
248 Supplementary Tables S6-10). At the earliest timepoint (E9.0), there are significant  
249 transcriptional differences in PA2 between WT and *a2KO* embryos, indicating that *Hoxa2* plays  
250 an important early role in shaping PA2 identity. These molecular differences then decrease as  
251 NCCs colonize the PAs (E9.5-E10.0), but then pronounced differences once again arise in their  
252 expression profiles as they begin to differentiate at E10.5 (Fig. 2B). Many of the genes  
253 differentially expressed between WT PA2 and *a2KO* PA2 are specific to a particular timepoint.  
254 For example, 65% of genes differentially expressed at E9.0 and 62% of genes differentially  
255 expressed at E10.5 are not differentially expressed at any other timepoint (Supplementary Fig.  
256 S1C-D). Thus, the loss of HOXA2 results in series of dynamic changes in the transcriptional  
257 program of NCCs from PA2. Consistent with the observed *Hoxa2*<sup>-/-</sup> phenotype of increased  
258 ossification in PA2, the genes differentially expressed at E10.5 include *Msx2*, which is expressed  
259 at higher levels in *a2KO* PA2 than WT PA2, suggesting an increase in osteogenesis. Taken  
260 together, these data suggest that *Hoxa2* has multiple roles in regulating transcriptional  
261 programs in different phases of NCC development – i.e. migration and differentiation.

262

263 PA2 is not transformed to the molecular character of PA1 in the absence of *Hoxa2* activity

264 Our bRNAseq analysis indicates that the establishment and maintenance of the  
265 transcriptional signature of PA2 depend upon HOXA2 (Fig. 2B). We then examined whether the  
266 changes observed in the transcriptional profiles of PA2 represent a general reversion to that of  
267 PA1, as predicted by the ground state model. To compare transcriptional signatures over the  
268 timecourse between the WT and *a2KO* samples, we performed principal component analysis  
269 (PCA) to visualize similarities and differences between their profiles (Fig. 2C). WT PA1 and PA2  
270 begin by clustering separately at E9.0 and E9.5, in accordance with our observation that in  
271 these early stages of NCC development, gene expression differs greatly between the two (Fig.  
272 2A, C). The differences are less pronounced at the E10.0 and E10.5 timepoints. If PA2 converts  
273 to a PA1-like signature in *a2KO* mutants, in association with the transformation of PA2  
274 derivatives to PA1, at some point in the timecourse we expected to see *a2KO* PA2 begin to  
275 cluster with PA1 of WT and *a2KO* embryos. To our surprise, the transcriptome of *a2KO* PA2  
276 samples at all timepoints continues to cluster with the corresponding transcriptome of WT  
277 PA2 and do not at any point cluster with PA1 samples from WT or *a2KO* embryos (Fig. 2C). The  
278 fact that this continues into E10.5, when gene activity has previously been shown to be altered  
279 due to the absence of *Hoxa2* (Santagati et al. 2005; Donaldson et al. 2012), suggests that the  
280 clear phenotypic transformation of PA2 derivatives in *a2KO* embryos is not accompanied by a  
281 general transition in the transcriptional state of PA2 to that of PA1. Hence, the phenotypic  
282 ground state is not reflected in an underlying common molecular ground state.

283

284 Single-cell transcriptomics reveals heterogeneity of PA1 and PA2 during NCC differentiation

285 One possible explanation for the observed lack of transformation at the transcriptional  
286 level is heterogeneity in the tissue collected via manual dissection of PAs (Fig. 1A & 3B). While a  
287 large fraction of the cells in the PAs at the stages examined are NCCs, cells from other tissues of  
288 the PAs (ectoderm, endoderm and mesoderm) may make it difficult to identify NCC-specific  
289 effects using whole PAs. The concerns about tissue heterogeneity and the challenges of

290 understanding tissue-specific effects of *Hoxa2* in this context led us to pursue a higher-  
291 resolution technique to address these questions at the level of single cells. Because our  
292 bRNAseq analysis and previously published data (Santagati et al. 2005; Donaldson et al. 2012;  
293 Amin et al. 2015) support a significant contribution of HOXA2 to NCC differentiation, we  
294 collected PA1 and PA2 from WT and *a2KO* embryos at E10.5 and performed scRNAseq to  
295 compare gene expression at the single-cell level (Fig. 3A). As with our bRNAseq experiments,  
296 we used whole PAs to maintain cell health during collection and to avoid biasing the isolation  
297 process by ensuring access to a full repertoire of cellular components of the PAs. The presence  
298 of non-NCC tissues also allows further interrogation of cell non-autonomous effects. After  
299 filtering the data for quality, we performed an integrated analysis in Seurat v3 (Stuart et al.  
300 2019) to concurrently look at all four samples (Supplementary Fig. S2). To facilitate accessibility  
301 to these data, we have created and made available an R ShinyApp to visualize gene expression  
302 across cells in this dataset, available at [https://simrcompbio.shinyapps.io/irp\\_scrnaseq\\_2020/](https://simrcompbio.shinyapps.io/irp_scrnaseq_2020/).

303



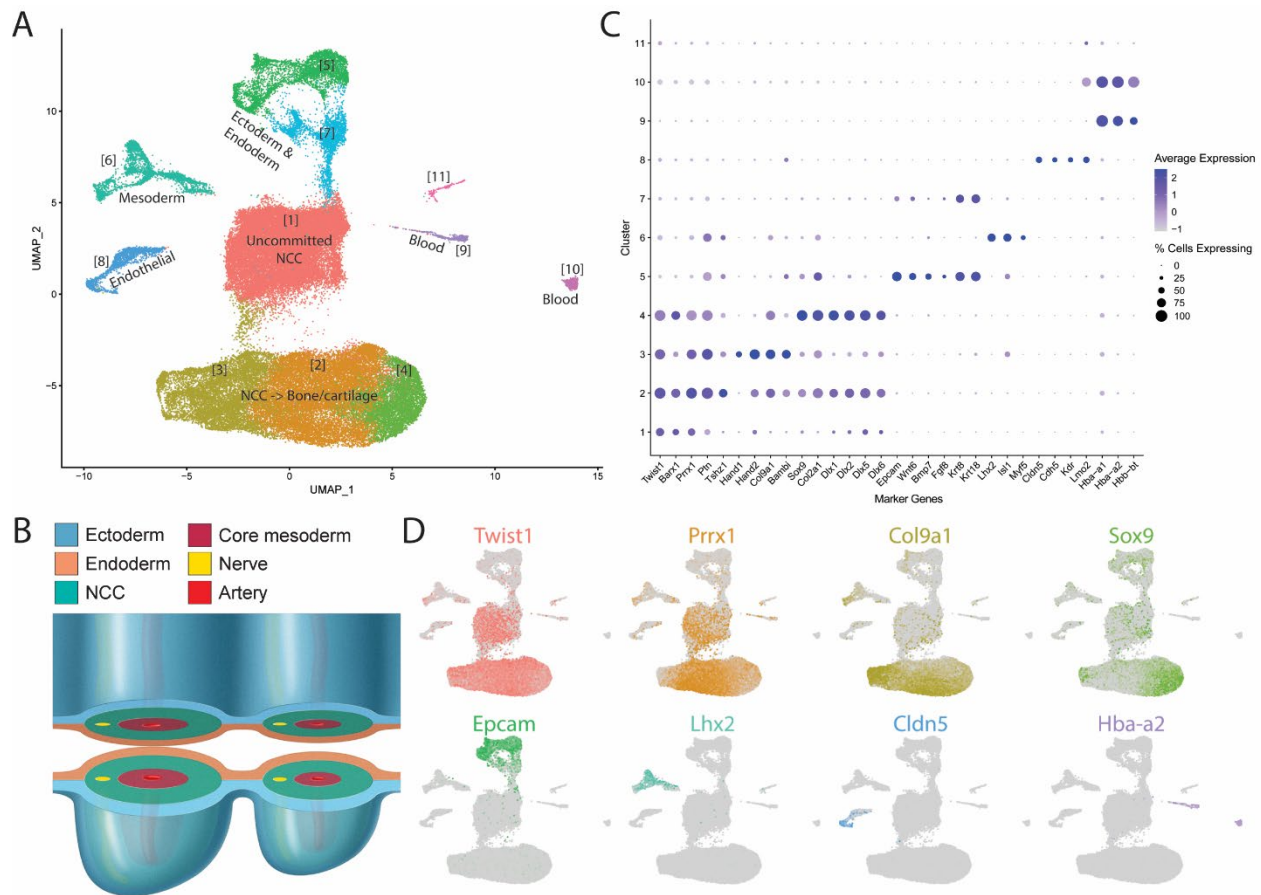

304

305 **Figure 3.** Single-cell RNAseq data demonstrate the heterogeneity of cells in the PAs. A) Uniform  
 306 manifold approximation and projection (UMAP) depicting a total of 67,674 cells across the four  
 307 samples were used for downstream analysis after quality control filtering for low sequencing  
 308 depth and doublets. B) Cross-section representing key PA structures at the onset of NCC  
 309 differentiation (E10.5). C) Marker gene expression allows the identification of eleven distinct  
 310 clusters common to all PAs sampled. D) UMAP visualization of marker genes for selected  
 311 clusters.

312

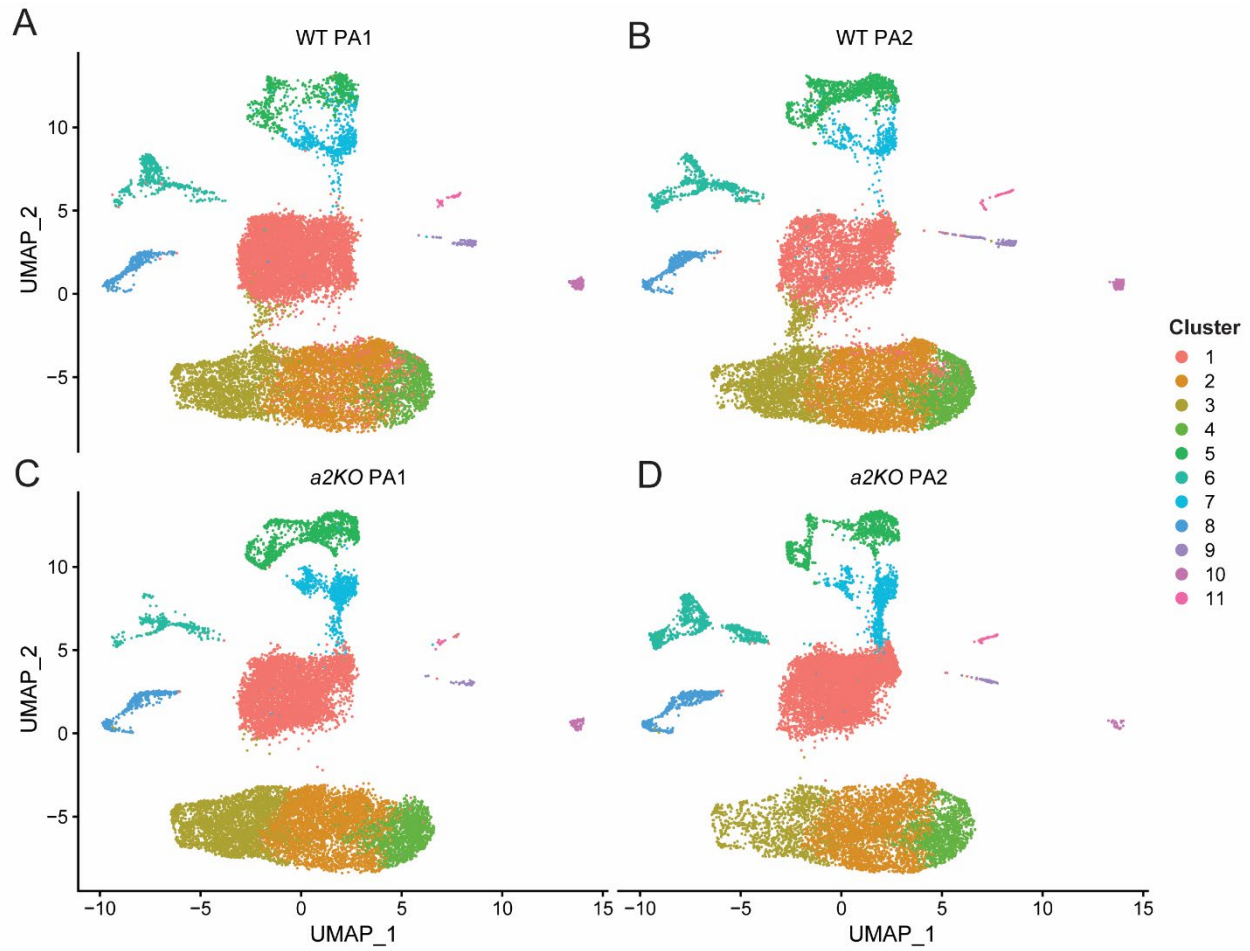

313

314 **Supplementary Figure S2.** UMAP visualization of cells from each of the four samples. Cells  
315 colored by cluster as defined in Figure 3. A) WT PA1. B) WT PA2. C) *a2KO* PA1. D) *a2KO* PA2.

316

317

318 Clustering the cells from all four samples results in 67,674 cells arranged in 11 clusters  
319 (Fig. 3A). Based on known marker genes characteristic of tissues and cell types, we were able to  
320 assign identities to the cells in each cluster (Table 1, Fig. 3C-D, Supplementary Table S11).

321 **Table 1.** Cluster identity of cells from E10.5 WT PA1, WT PA2, a2KO PA1, and a2KO PA2.

| Cluster | Identity              | Marker genes                    |
|---------|-----------------------|---------------------------------|
| 1       | Uncommitted NCC       | Twist1, Barx1, Crabbp1, Dlx6    |
| 2       | NCC -> bone/cartilage | Twist1, Prrx1, Col9a1           |
| 3       | NCC -> bone/cartilage | Hand1, Hand2, Col9a1            |
| 4       | NCC -> bone/cartilage | Sox9, Col2a1, Dlx1, Dlx2, Barx1 |
| 5       | Endoderm & ectoderm   | Epcam, Wnt6, Fgf8, Bmp7         |
| 6       | Mesoderm              | Myf5, MyoD                      |
| 7       | Endoderm & ectoderm   | Epcam, Wnt6, Fgf8, Bmp7         |
| 8       | Endothelial           | Cldn5, Kdr, Lmo2                |
| 9       | Blood                 | Hbb-bs, Hba-a1, Hbb-bt          |
| 10      | Blood                 | Hba-bh1, Hba-a1, Hbb-a2         |
| 11      | Unknown               | Pf4, Fcer1g, Tyrobp, C1qb, Lyz2 |

322

323 At E10.5, the majority of the cells (80.2%), represented by clusters 1-4, are of neural  
324 crest origin and many of them show gene expression profiles characteristic of cells that have  
325 begun to differentiate into NCC derivatives. Clusters 2-4 correspond to NCCs differentiating into  
326 bone and cartilage, characterized by the expression of established marker genes such as *Sox9*,  
327 *Col2a1*, *Col9a1*, *Prrx1*, *Hand1*, and *Hand2*. We also observe a population of NCCs (cluster 1) that  
328 express known NCC markers, including *Twist1* and *Barx1*, but do not express genes indicative of  
329 a commitment to a particular fate. These may represent a later-migrating population of NCCs  
330 that have yet to initiate programs of differentiation at the time of tissue collection.

331 In addition to NCCs, we also observe populations of ectodermal and endodermal cells  
332 (clusters 5 & 7), as well as pharyngeal mesoderm (cluster 6) and endothelium (cluster 8). Two  
333 clusters of cells (clusters 9 & 10) are largely defined by their expression of hemoglobin genes,  
334 suggesting that they are blood cells. There are several possible sources of blood cells in this  
335 experiment that likely explain the presence of these two clusters - one source being

336 contamination picked up from the dish during PA isolation and the other corresponding to  
337 blood cells developing in the PAs. Finally, there is a small cluster (11) of cells that do not  
338 correspond to a known cell type. In summary, these transcriptional profiles of single cells within  
339 the PAs allow us to identify populations that reflect specific tissues and cell types known to  
340 reside within PA1 and PA2 of WT and *a2KO* embryos, including NCCs undergoing  
341 differentiation.

342

### 343 NCC clustering reflects spatial, temporal and cell type differences

344 The scRNAseq dataset enables us to identify individual subsets of NCCs as they commit  
345 to specific fates and begin to form derivative structures. The four clusters of NCCs and NCC  
346 derivatives (clusters 1-4) display underlying transcriptional differences that reflect spatial,  
347 temporal and cell type differences between and within PA1 and PA2. For example, looking at  
348 the distribution of proximal-distal markers, we see a clear gradient through the bone and  
349 cartilage derivatives (clusters 2-4). Cluster 3 contains distal NCCs marked by expression of  
350 *Hand1* and *Hand2*, while cluster 4 corresponds to proximal NCCs marked by expression of *Barx1*  
351 and *Pou3f3* (Fig. 4A). This data suggests a clear proximal-distal (right-left) order is reflected in  
352 the clustering of NCC-derived bone/cartilage. In cluster 1, the less committed NCCs, we see  
353 lower levels and greater heterogeneity in the expression of these proximal-distal markers,  
354 supporting the idea that this cluster corresponds to NCCs found throughout the arch that have  
355 not yet adopted a particular fate. Examining rostral-caudal markers in clusters 2-4, we see that  
356 cells in the lower left are marked to a greater extent by *Gsc*, indicating a caudal bias, while cells  
357 in the upper right are marked by *Lhx8*, indicative of rostral cells (Fig. 4B). Cluster 1 again shows  
358 lower levels and more heterogeneous expression of rostral-caudal markers, consistent with the  
359 idea that these cells cluster according to their identity as less committed NCCs rather than  
360 based on a spatial location within the arches. This illustrates that clustering trends that  
361 generate clusters 2-4 have captured positional information and spatial arrangements of NCCs in  
362 the PAs.

363

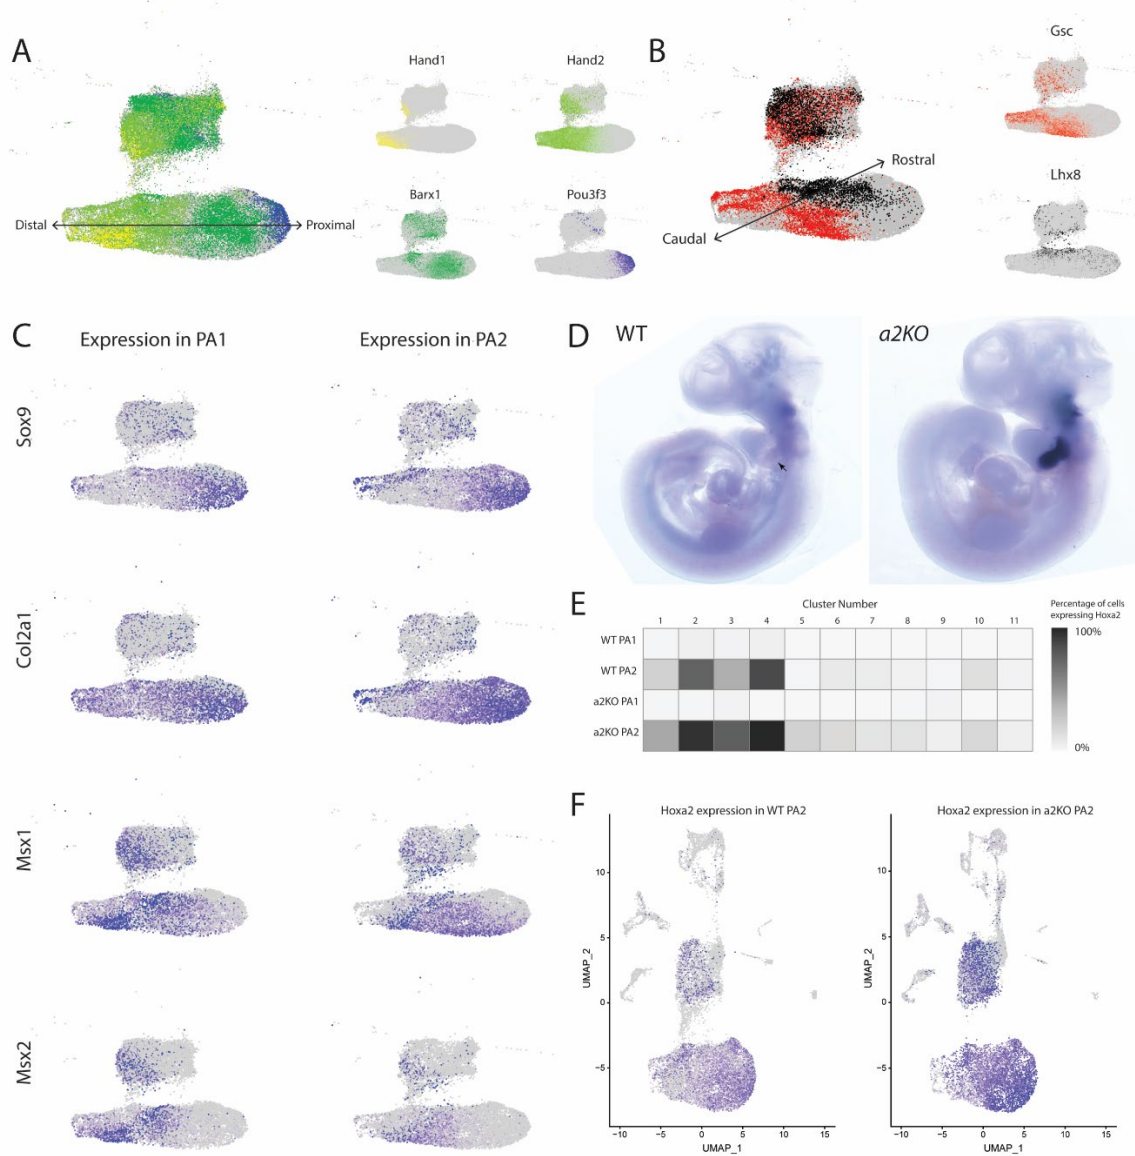

364

365 **Figure 4.** Spatial markers and *Hoxa2* expression delineate subsets of NCC derivatives. A) A left-  
 366 right distal-proximal axis emerges in NCC-derived bone/cartilage of the PAs. *Hand1* and *Hand2*  
 367 expression mark distal cells, while *Barx1* and *Pou3f3* expression mark proximal cells. B) An  
 368 upper right-lower left rostral-caudal axis emerges in bone/cartilage NCC derivatives, marked by  
 369 *Lhx8* (rostral) and *Gsc* (caudal) expression. C) Markers of chondrogenesis, *Sox9* and *Col2a1*, are  
 370 segregated in their expression from markers of osteogenesis, *Msx1* and *Msx2*. D) *Hoxa2*  
 371 expression in WT and *a2KO* mouse embryos at E10.5. D) *Hoxa2* expression in WT PA2 (left) and  
 372 *a2KO* PA2 (right). *Hoxa2* transcript is still observed in *a2KO* PA2 due to the nature of the *a2KO*  
 373 allele, in which the gene is still transcribed but the transcript cannot be translated. E)  
 374 Percentage of cells in each cluster expressing *Hoxa2* transcript. F) Visualization of *Hoxa2*  
 375 expression in WT PA2 (left) and *a2KO* PA2 (right) in scRNAseq data.

376           With respect to cell types, markers of chondrogenesis and osteogenesis also display a  
377 fair amount of segregation (Fig. 4C and Supplementary Fig. S3). *Sox9* and *Col2a1*, hallmarks of  
378 chondrogenesis, show the highest levels of expression in cluster 4, with limited expression at  
379 the distal-most tip of cluster 3. We observe similar levels of expression between PA1 and PA2,  
380 with a bias toward the proximal domain of the arches, consistent with previous descriptions of  
381 their expression domains. In contrast, *Msx1* and *Msx2*, regulators of osteogenesis, are largely  
382 expressed in cluster 2. Expression of these genes is higher in PA1 than PA2, as expected  
383 considering greater intramembranous ossification in PA1 (Minoux and Rijli 2010). Moreover,  
384 *Msx1* and *Msx2* expression is biased in both arches toward the distal end of the clusters,  
385 consistent with their endogenous patterns of expression. This segregation and lack of overlap  
386 between differentiation markers supports the observation that chondrogenesis and  
387 osteogenesis are occurring in distinct groups of cells. In cluster 1, the expression of all of these  
388 markers is lower and less segregated, consistent with the idea that these cells have not yet  
389 committed to a bone/cartilage fate. Taken together, these transcriptional profiles reveal that  
390 NCC-derived bone and cartilage cells, undergoing differentiation at E10.5, show spatial and cell  
391 differentiation biases in their clustering that capture diverse endogenous features of NCCs in  
392 the PAs.

393



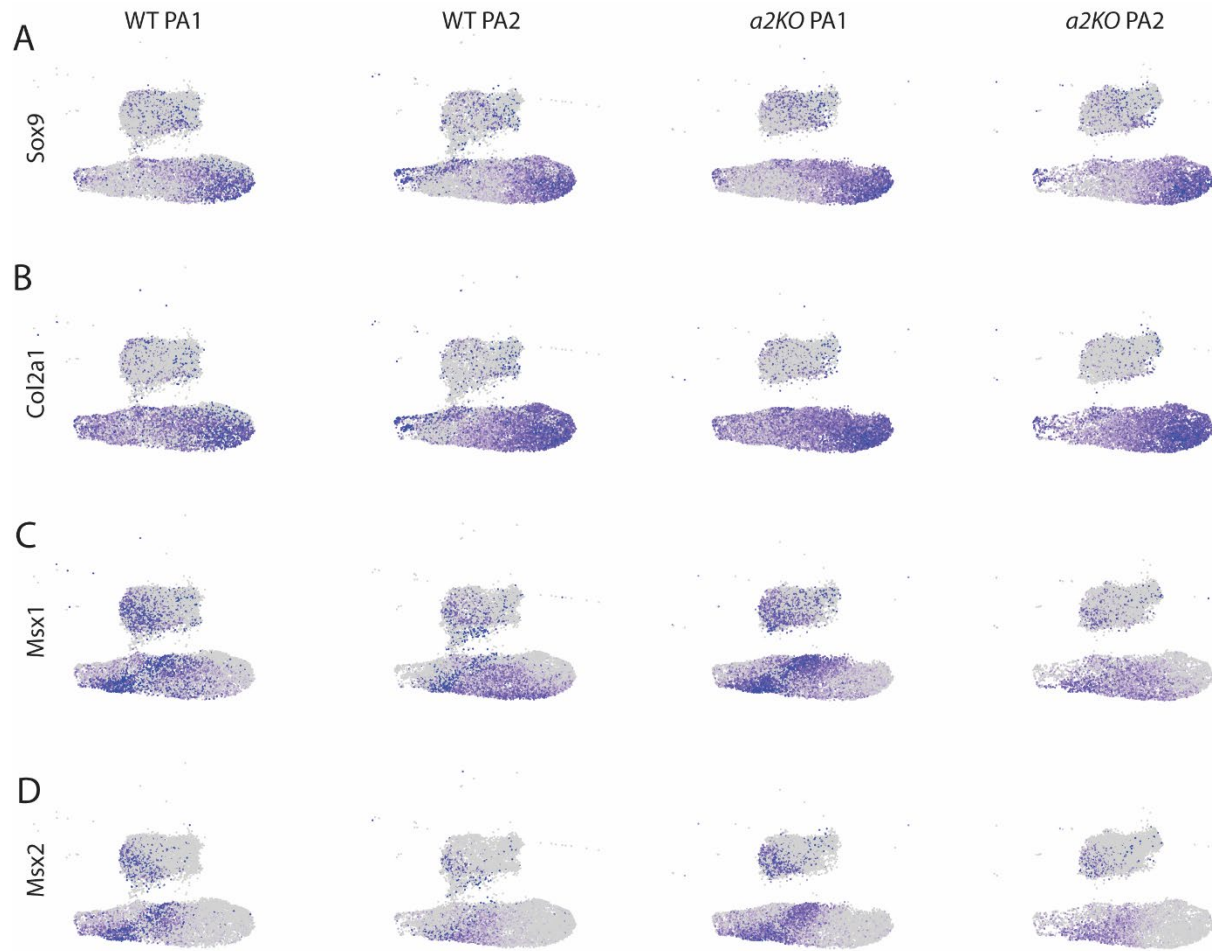

394

395 **Supplementary Figure S3.** Visualization of chondrogenesis and osteogenesis markers across WT  
396 and *a2KO* PA1 and PA2. A) Chondrogenesis marker *Sox9*. B) Chondrogenesis marker *Col2a1*. C)  
397 Osteogenesis marker *Msx1*. D) Osteogenesis marker *Msx2*.

398



399 *Hoxa2* expression is enriched in NCCs and NCC-derived clusters at E10.5

400 To probe the role of *Hoxa2* in specifying axial identity, we next wanted to examine its  
401 expression within the scRNAseq dataset. We designed the *a2KO* mutation so that the  
402 homozygous mutant mice produce a *Hoxa2* transcript with a small change (7 nt) spanning the  
403 initiation codon, which prevents translation. This enables us to monitor endogenous *Hoxa2*  
404 transcripts in embryos of both WT and *a2KO* embryos. To validate this ability, we performed  
405 whole mount in situ hybridization in E10.5 WT and *a2KO* embryos and found that *Hoxa2* is  
406 expressed in identical domains in the hindbrain and PAs (Fig. 4D). Intriguingly, we observe  
407 higher levels of *Hoxa2* transcripts in PA2 of the *a2KO* mutants compared to WT embryos, which  
408 is consistent with levels observed in our bulk and single cell RNAseq data (Fig. 4F). This domain-  
409 specific elevation of *Hoxa2* transcript levels may arise through the input of cross-regulatory  
410 feedback circuits known to modulate *Hox* expression in the hindbrain and NCCs (Parker et al.  
411 2019; Parker and Krumlauf 2020). The ability to monitor endogenous *Hoxa2* transcripts in *a2KO*  
412 mutants is important because the expression of *Hoxa2* serves as a lineage tracer in this system  
413 and indicates that these cells survive even in the absence of HOXA2. Moreover, directly  
414 comparing the properties of cells expressing *Hoxa2* in WT and *a2KO* embryos enables us to  
415 identify transcriptional differences associated with *Hoxa2*-dependent activity.

416 In PA1 of WT and *a2KO* embryos, which are expected to be *Hox*-negative, fewer than 5%  
417 of the cells express *Hoxa2* and they are not enriched in any single cluster (Fig. 4E and  
418 Supplementary Fig. S4). The low fraction of *Hoxa2*-expressing cells observed could be due to  
419 contamination during the cell collection process or a small population of *Hoxa2*-expressing cells  
420 in the tissue that have not been previously described. In both WT and *a2KO* PA2, we see the  
421 highest levels of *Hoxa2* transcript in NCCs and NCC-derived clusters (1-4), with very few cells  
422 expressing *Hoxa2* in surface ectoderm, endoderm, mesoderm or endothelia (Fig. 4F).  
423 Expression of *Hoxa2* is spread throughout clusters 2-4, with higher levels of expression in  
424 clusters 2 and 4 than clusters 1 and 3. The differences in expression levels in NCC clusters may  
425 be related to the emerging identities and fates of these cells and the temporally dynamic roles  
426 of HOXA2 on the establishment of these identities.

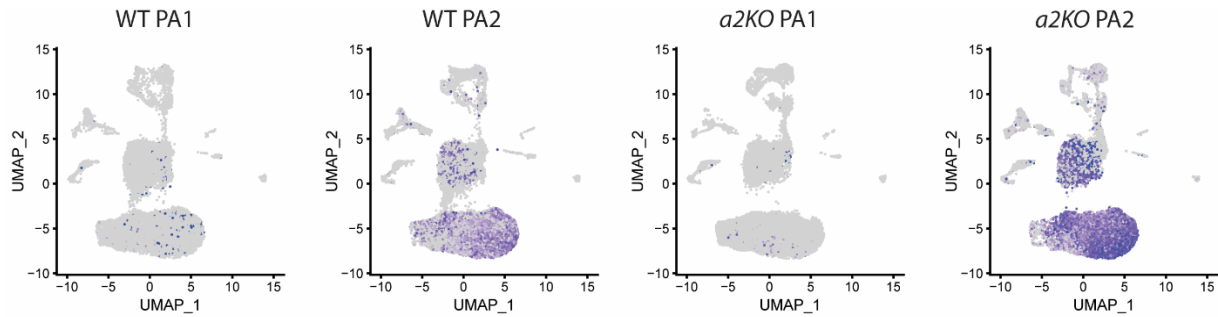

427

428 **Supplementary Figure S4.** Visualization of *Hoxa2* expression in WT PA1, WT PA2, *a2KO* PA1,  
429 and *a2KO* PA2.

430

431 Comparing transcriptional signatures of PA1 and PA2

432 We sought to leverage the richness of our bRNAseq and scRNAseq datasets to  
433 understand key characteristics that define the transcriptional states of PA1 and PA2, as well as  
434 how these states are modified in the absence of *Hoxa2*. Returning to the differential expression  
435 analysis of our bRNAseq datasets, we focused on early differentiation at E10.5 and looked at  
436 genes differentially expressed between WT PA1 and WT PA2 (Supplementary Table S12). We  
437 refer to the 126 genes more highly expressed in PA1 as the 'PA1 transcriptional signature' and  
438 the 164 genes more highly expressed in PA2 as the 'PA2 transcriptional signature' (Fig. 5A-B).

439 We then compared the expression of genes in these signatures between WT and *a2KO*  
440 embryos at E10.5 using the bRNAseq dataset. As expected, because *Hoxa2* is not expressed in  
441 PA1, we observe that the genes of the PA1 signature are highly expressed in both WT PA1 and  
442 *a2KO* PA1 (Fig. 5A). Interestingly, we do not see a noticeable increase in their expression in  
443 *a2KO* PA2 over WT PA2, which would be expected in a reversion of the mutant tissue to a PA1-  
444 like ground state. Equally strikingly, we see that many of the genes of the PA2 signature are  
445 likewise still strongly expressed in *a2KO* PA2 (Fig. 5B). The persistence of components of the  
446 PA2 signature and lack of induction of the PA1 signature further support the idea that there has  
447 not been a conversion of the transcriptional state of PA2 in *a2KO* embryos to a PA1-like state at  
448 this stage in association with the phenotypic transformation.

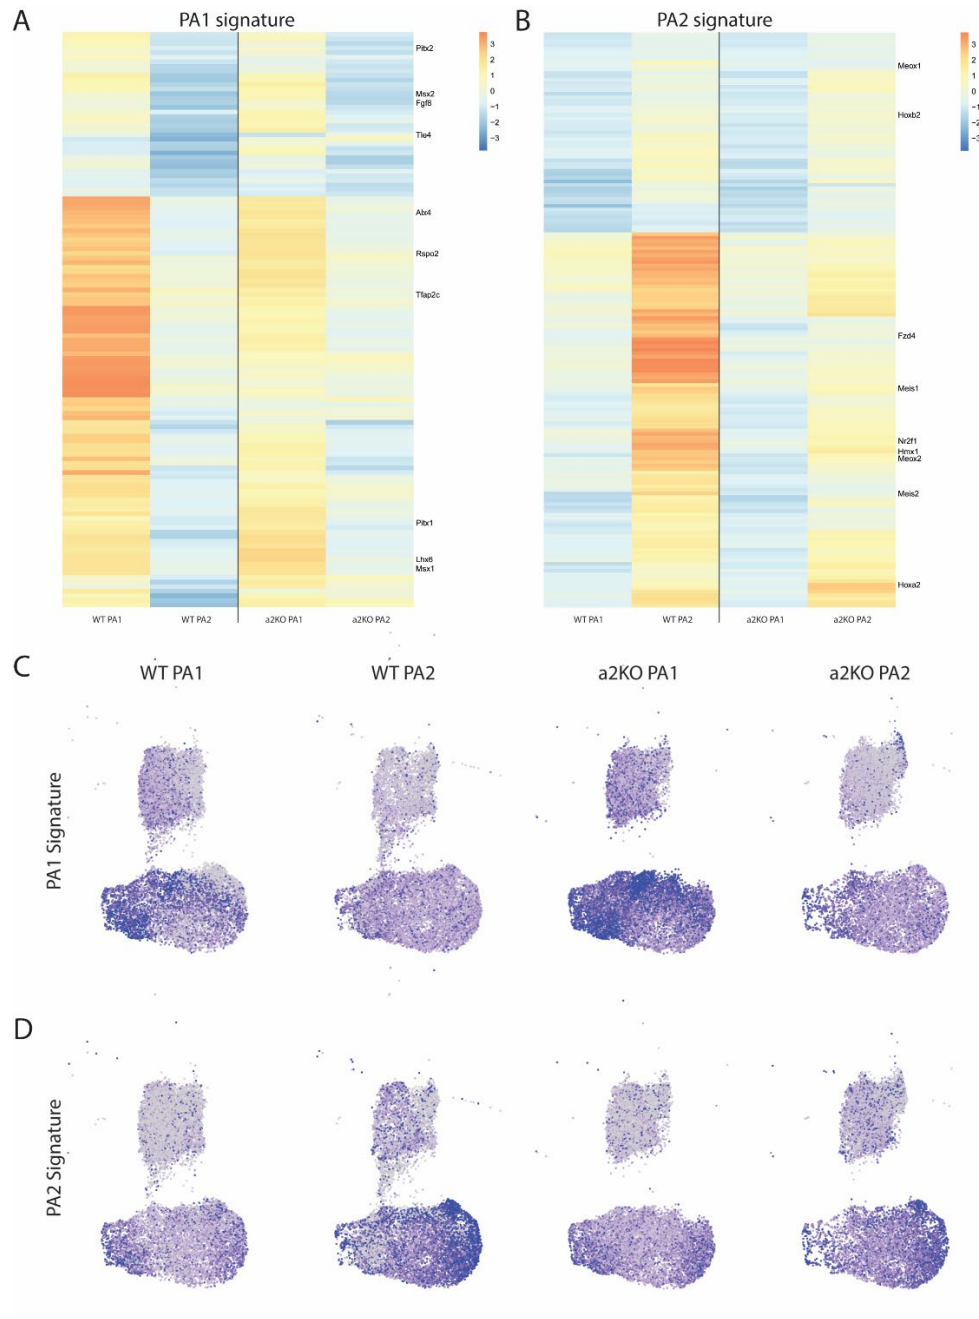

449

450 **Figure 5.** Transcriptional signatures of PA1 and PA2 at the onset of NCC differentiation.  
451 Differential expression analysis from bRNAseq between WT PA1 and WT PA2 at E10.5  
452 generated a 126-gene PA1 transcriptional signature and 164-gene PA2 transcriptional  
453 signature. Visualization of these signatures across bRNAseq (A & B) and scRNAseq (C & D) E10.5  
454 datasets across WT PA1, WT PA2, *a2KO* PA1, and *a2KO* PA2 reveals trends in transcriptional  
455 identity. bRNAseq data (A & B) shown as Z-scores of expression across all conditions and  
456 timepoints for each gene. scRNAseq data (C & D) shown as normalized expression of a  
457 MetaFeature for each PA-specific signature across NCCs in each condition.

458           The expression of these transcriptional states is consistent between the bRNAseq and  
459 scRNAseq datasets. Aggregate gene expression of the PA1 signature is strongest in distal NCCs  
460 (cluster 3). We again observe strong expression of these genes in both WT and *a2KO* PA1, with  
461 limited expression in WT and *a2KO* PA2 (Fig. 5C). Aggregate gene expression of the PA2  
462 signature is strongest in proximal NCCs (cluster 4). This expression is maintained in PA2 even in  
463 the absence of HOXA2 (Fig. 5D). Taken together, these data show that the *Hoxa2*<sup>-/-</sup> phenotypic  
464 reversion is not matched by a corresponding molecular transformation of PA2 to a PA1-like  
465 transcriptional ground state.

466

#### 467 Integration of transcriptomic datasets to identify putative HOXA2 targets in NCCs

468           To search for *Hoxa2*-dependent genes associated with axial specification, we identified  
469 genes that are differentially expressed between PA1 and PA2 in WT embryos, as well as those  
470 whose expression in PA2 changed in *a2KO* mutant embryos. For candidate genes specifying PA1  
471 fate, we searched for genes that are expressed at higher levels in PA1 than PA2 of WT embryos,  
472 and also for those expressed at higher levels in PA2 of *a2KO* mutant embryos (potentially  
473 repressed by HOXA2) compared to WT. Conversely, for genes specifying PA2 fate, we identified  
474 genes that are expressed at higher levels in PA2 than PA1 of WT embryos, and those expressed  
475 at higher levels in PA2 of WT (potentially activated by HOXA2) compared to *a2KO* embryos. This  
476 two-step selection strategy identifies candidate genes that are downstream of *Hoxa2* and play  
477 potential roles in regulating the axial identity of NCCs.

478           To further exploit our transcriptomic datasets, we applied these criteria to both the  
479 bRNAseq dataset and the NCC and NCC-derived clusters (1-4) of the scRNAseq dataset,  
480 identifying 90 PA1 specifiers and 233 PA2 specifiers (Supplementary Tables S13 & S14). Among  
481 PA1 specifiers identified across datasets, we observe a very strong enrichment of ribosomal  
482 components and functions, including Gene Ontology (GO) terms for translation, peptide  
483 biosynthetic process, and RNA processing (Supplementary Table S15). The increase in  
484 expression of these components of protein synthesis in *a2KO* samples suggests they may be  
485 negatively regulated by *Hoxa2*. In contrast, PA2 specifiers are strongly enriched for

486 transcription factors and transcriptional regulation, featuring GO terms such as protein binding,  
 487 *cis*-regulatory region binding, and anatomical structure development (Supplementary Table  
 488 S16). The decrease in expression levels of these genes in *a2KO* embryos indicates they may be  
 489 positively regulated by HOXA2.

490 **Table 2.** Putative *Hoxa2*-responsive axial specifiers identified through differential gene  
 491 expression analysis from bRNAseq and scRNAseq NCC clusters.

| Hoxa2-repressed PA1 specifiers |                        |              | Hoxa2-activated PA2 specifiers |              |               |
|--------------------------------|------------------------|--------------|--------------------------------|--------------|---------------|
| <i>Ribosomal</i>               | <i>Hoxa2-repressed</i> | <i>Novel</i> | <i>Hoxa2-activated</i>         | <i>Novel</i> |               |
| Rpl35                          | Lhx6                   | <b>Prrx1</b> | Meox1                          | Pax9         | <b>Enho</b>   |
| Rpl27                          | Alx4                   | <b>Ift57</b> | <b>Meis1</b>                   | <b>Tbx15</b> | <b>Errfi1</b> |
| mt-Rnr1                        | <b>Rspo2</b>           | <b>Rnd3</b>  | <b>Meis2</b>                   | <b>Cntfr</b> | <b>Nr2f1</b>  |
| mt-Rnr2                        | <b>Barx1</b>           | Peg10        | <b>Fzd4</b>                    | Pou3f4       | Hmx1          |
| Npm1                           | Pitx1                  | <b>Tle4</b>  | <b>Zfp703</b>                  | <b>Ptn</b>   | <b>Tshz1</b>  |

492

493 From candidate *Hoxa2*-responsive specifiers, some of the individual genes revealed by  
 494 this comparative analysis offer insight into potential downstream pathways involved in the  
 495 process (Table 2 and Fig. 6A-B). Among PA1 specifiers, we see a number of ribosomal subunits  
 496 and rRNA processing genes, including *Rpl35*, *Rpl27*, *mt-Rnr2*, and *Npm1*. We also identified  
 497 genes previously shown to be negatively regulated by *Hoxa2*, including *Lhx6*, *Alx4*, *Rspo2*,  
 498 *Barx1*, and *Pitx1* (Bobola et al. 2003; Santagati et al. 2005; Kirilenko et al. 2011; Donaldson et al.  
 499 2012), validating the approach. Additionally, this analysis uncovered genes of interest that have  
 500 not been previously characterized for their response to *Hoxa2* or their role in the specification  
 501 of NCC axial identity, including *Tle4*, *Rnd3*, *Ift57*, and *Peg10*. Many of the candidate PA2  
 502 specifiers we identified are transcription factors, including well-characterized *Hoxa2* targets  
 503 such as *Meis1*, *Meis2*, and *Meox1* (Kirilenko et al. 2011; Donaldson et al. 2012; Amin et al.  
 504 2015). In addition, some of the genes we identified as being dependent upon *Hoxa2*, are known  
 505 to be functionally linked with specification of NCC, including *Zfp503*, *Zfp703*, and *Fzd4*  
 506 (Donaldson et al. 2012). Furthermore, a number of novel targets emerged from this analysis,

507 including *Ptn*, *Cntfr*, *Enho*, *Errfi1*, *3110099E03Rik*, *Pou3f4*, *Hmx1*, and *Nr2f1*. Our selection  
508 strategy, based on analyses of bulk and scRNAseq datasets, has identified a list of candidate  
509 *Hoxa2*-responsive specifiers of NCC axial identity that include many novel and previously  
510 described genes involved in NCC development.

511

#### 512 Identification of putative direct targets of HOXA2 in axial specification of NCCs

513 To explore whether any of the candidate axial specifiers of PA1 and PA2 identified from  
514 our analyses may be directly regulated by *Hoxa2*, we leveraged published genome-wide binding  
515 data of endogenous HOXA2 protein in mouse PA2 at E11.5 (Donaldson et al. 2012). Despite the  
516 difference in developmental stages, this dataset presents an opportunity for comparison of our  
517 data at E10.5 with HOXA2 binding in differentiating NCCs at E11.5. In total, we find that 24/90  
518 PA1 specifiers (26.7%) and 91/233 PA2 specifiers (39.1%) have at least one nearby HOXA2  
519 binding peak, suggesting possible direct regulation by HOXA2 (bold in Table 2 and Fig. 6A-B). In  
520 this comparison we observe that a number of genes that have been previously identified as  
521 direct targets of HOXA2 show nearby binding, including putative PA1 specifiers *Barx1* and  
522 *Rspo2*, as well as putative PA2 specifiers *Fzd4*, *Meis1*, and *Meis2*. However, other published  
523 targets of *Hoxa2* may be indirect, as evidenced by a lack of nearby HOXA2 binding. These  
524 include putative PA1 specifiers *Pitx1* and *Alx4*, as well as putative PA2 specifier *Meox1*.

525 In conclusion, this integration of DNA binding data with our analysis has allowed us to  
526 identify candidate axial specifiers of NCC identity which are directly and indirectly downstream  
527 of *Hoxa2* in patterning the PAs. Together, these data provide insight into the molecular  
528 mechanisms and cell populations through which HOXA2 establishes the axial identity of PA2.

529

#### 530 Putative axial specifiers show diverse responses to HOXA2 activity

531 To deepen our understanding of the mechanisms by which putative axial specifiers  
532 uncovered through our analyses of bRNAseq and scRNAseq data impart axial identity, we  
533 sought to validate our findings and explore how these genes behave across PA1 and PA2 in

534 both WT and *a2KO* embryos. We observe expression of these genes throughout the NCCs and a  
535 diverse set of responses to the absence of HOXA2. *Prrx1*, a putative PA1 specifier, has been  
536 shown to be essential for skeletogenesis, including correct specification of the middle ear  
537 (Martin et al. 1995) but had not previously been associated with *Hox* gene expression. We  
538 observe expression of *Prrx1* in PA2 of *a2KO* embryos, but not their WT littermates (Fig. 6C).  
539 Putative PA2 specifiers *Nr2f1* and *Tshz1* show the converse trend – reduced expression in *a2KO*  
540 PA2 when compared to WT littermates (Fig. 6D-E). *Nr2f1* has been implicated in positive  
541 regulation of NCC enhancers (Rada-Iglesias et al. 2012) and the *Nr2f* family of nuclear receptors  
542 has been shown to play a role in the specification of bone and cartilage in the zebrafish jaw  
543 (Barske et al. 2018). *Tshz1* has been shown to play a role in middle ear development (Coré et al.  
544 2007). However, neither gene has previously been shown to interact with *Hox* genes.

545         The genes identified by the comparative analyses above show unique spatial expression  
546 patterns and responses to HOXA2 activity, suggesting distinct roles for these genes in *Hoxa2*-  
547 mediated axial specification. The *in vivo* observations also help to validate the differential  
548 association of these putative targets with specific subsets of NCCs in clusters 1-4 uncovered by  
549 our datasets (Fig. 6A-B and Supplementary Tables S13 and S14). We believe that many other  
550 genes identified in our comparative analysis share similar properties and with thorough  
551 functional validation will enhance our understanding of *Hox*-mediated NCC axial specification.  
552 In contrast to what might be expected based on the observed phenotypic transformation in  
553 *Hoxa2* mutants, we conclude that there is not a singular molecular ground state in NCCs that is  
554 dramatically switched by HOXA2 to impart a PA2 fate. Rather, we see different transcriptional  
555 profiles for PA1 and PA2 with subsets of NCCs expressing distinct sets of genes in each PA.  
556 Moreover, we see that many of the putative axial specifiers identified here do not depend upon  
557 HOXA2 in all NCCs but rather show marked differences in subsets of cells. This suggests that  
558 subsets of cells are likely to be responsible for imparting specific cell fates and morphogenic  
559 features in the PAs (Fig. 6F). This context dependent role for HOXA2 uncovers complexity in our  
560 understanding of NCC axial specification and highlights an unexplored heterogeneity of the  
561 system.



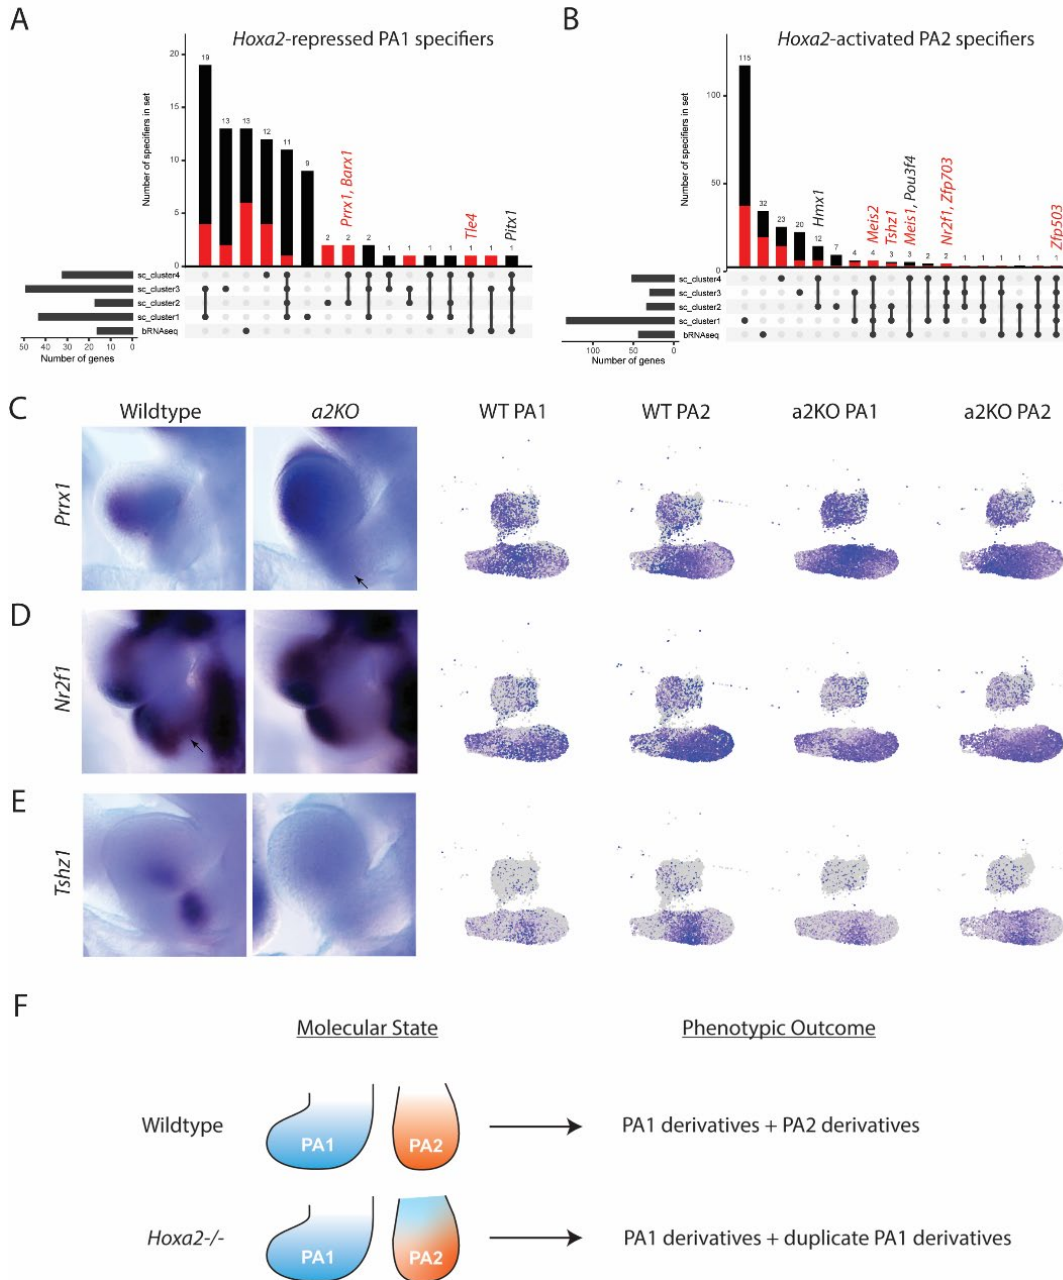

562

563 **Figure 6.** Putative axial specifiers show heterogeneous responses to *Hoxa2* activity. A & B)  
 564 UpSet plots depicting putative axial specifiers from bRNAseq and scRNAseq clusters 1-4. Red  
 565 bars and text refer to putative direct targets of HOXA2 – those with nearby HOXA2 binding  
 566 (Donaldson et al. 2012). A) *Hoxa2*-repressed PA1 specifiers. B) *Hoxa2*-activated PA2 specifiers.  
 567 C-E) *In situ* hybridization and FeaturePlots showing expression in scRNAseq data for each gene  
 568 in WT and *a2KO* embryos at E10.5, focusing on PA1 and PA2. C) PA1 specifier *Prrx1* shows  
 569 expression in PA2 of *a2KO* embryos. PA2 specifiers *Nr2f1* (D) and *Tshz1* (E) show reduced  
 570 expression in PA2 of *a2KO* embryos. F) Summary illustrating that the molecular state of PA2  
 571 does not correlate with the phenotypic outcome of PA2 in *a2KO* mutants.

## 572 Discussion

573 *Hox* genes play a key role in craniofacial development by specifying the axial identity of  
574 neural crest cells migrating into the pharyngeal arches of the developing head. In this study, we  
575 have used genomic approaches to investigate the transcriptional programs that underlie the  
576 role of *Hoxa2* in specifying the fate of PA2 NCCs. *Hoxa2* is believed to be a selector gene that  
577 serves as a regulatory switch to convert a PA1 ground state into a unique PA2 identity.  
578 Comparing the bulk and single cell transcriptomes of PA1 and PA2 in wildtype and *Hoxa2*  
579 mutant embryos during NCC migration and differentiation, we find that the phenotypic  
580 transformations observed in *Hoxa2* mutants is not matched by a corresponding molecular  
581 transformation of PA2 to a PA1-like transcriptional ground state. This separation of phenotypic  
582 and molecular states has significant implications for our understanding of NCC biology and  
583 craniofacial development. The scRNAseq analyses also reveal heterogenous expression patterns  
584 in NCC populations within the PAs and the changes observed upon loss of HOXA2 suggest that  
585 different subsets of NCCs may respond to HOXA2 activity in distinct manners related to their  
586 ultimate fate. Our findings raise a number of interesting issues important for understanding  
587 axial specification of NCCs and the role of HOXA2 in this process.

### 588 Transcriptional analysis suggests that there is not a molecular NCC ground state

589 Previous work has demonstrated the existence of a phenotypic ‘ground state’ among  
590 NCCs colonizing the PAs in the developing mouse embryo, which is modified by *Hox* gene  
591 expression to produce axial-specific derivatives (Minoux et al. 2009). In this study, we set out to  
592 understand the molecular underpinnings of this phenotypic ground state and identify the  
593 mechanisms by which *Hox* genes impart axial identity. To address this question, we began by  
594 comparing WT and *a2KO* PA1 and PA2 transcriptional profiles throughout NCC migration and  
595 differentiation (E9.0-E10.5). In WT embryos, we observe large differences in gene expression  
596 profiles between PA1 and PA2 from the earliest point in our timecourse – E9.0, when NCCs are  
597 migrating into the PAs (Fig. 2A). Hence, NCCs migrating into different PAs do not appear to  
598 emerge from the neural tube with a common or shared transcriptional signature that is  
599 progressively modified to generate unique axial identities. This contrasts with what might be

600 expected from populations of cells known to maintain plasticity and be highly responsive to  
601 environmental signals as they migrate at E9.0 (Trainor and Krumlauf 2000a; Trainor and  
602 Krumlauf 2000b; Schilling et al. 2001). Because the cells entering the PAs have distinct gene  
603 expression patterns based on their axial level of origin prior to delamination (Hindbrain *Hox*  
604 code in Fig. 1B), and have been previously shown to be primed to respond to different  
605 environmental cues in the PAs (Trainor and Krumlauf 2001; Trainor et al. 2002), it is not  
606 unreasonable to expect their gene expression profiles will differ during early phases of  
607 migration.

608           In comparing the transcriptomes of PA1 and PA2 in both WT and *a2KO* embryos, the  
609 existence of a molecular ground state underlying the previously described phenotypic  
610 transformation of PA2 to a PA1 identity would suggest that the transcriptome of PA2 reverts to  
611 a PA1-like transcriptome in *a2KO* embryos, mirroring the phenotypic reversion. We did not  
612 observe such a transformation or switch in the molecular identity of NCCs in PA2 over the  
613 course of their migration and differentiation (Fig. 2C). This argues against the existence of a  
614 common PA1-like molecular ground state in NCC development that is modified by *Hox*  
615 expression. The comparison of WT PA1 and *a2KO* PA1 also revealed a surprising number of  
616 differentially expressed genes (Supplementary Fig. S5 and Supplementary Tables S17-21). This is  
617 unexpected, as *Hoxa2* is not thought to be expressed within the NCCs giving rise to PA1  
618 derivatives (Couly et al. 1998) and no phenotypes in PA1 structures have been observed in  
619 *Hoxa2* mutant embryos (Gendron-Maguire et al. 1993; Rijli et al. 1993). These differences in the  
620 molecular character of PA1 generated by the loss of *Hoxa2* may reflect an unexpected early role  
621 for the gene in modulating properties of NCCs in the hindbrain before they emigrate to colonize  
622 PA1. Alternatively, the differences could be a consequence of altered signaling between PAs in  
623 mutant embryos or reflect previously undetected expression of *Hoxa2* in PA1 NCCs. In this  
624 regard, it is worth noting that our scRNAseq data suggest the presence of a small number of  
625 *Hoxa2* expressing cells in PA1 (Supplementary Fig. S4). Regardless of the underlying  
626 mechanism, this unexpected effect on gene expression in PA1 upon loss of HOXA2, reveals  
627 complexities in the establishment of the PA1 transcriptional signature that are not consistent  
628 with a molecular ground state model.

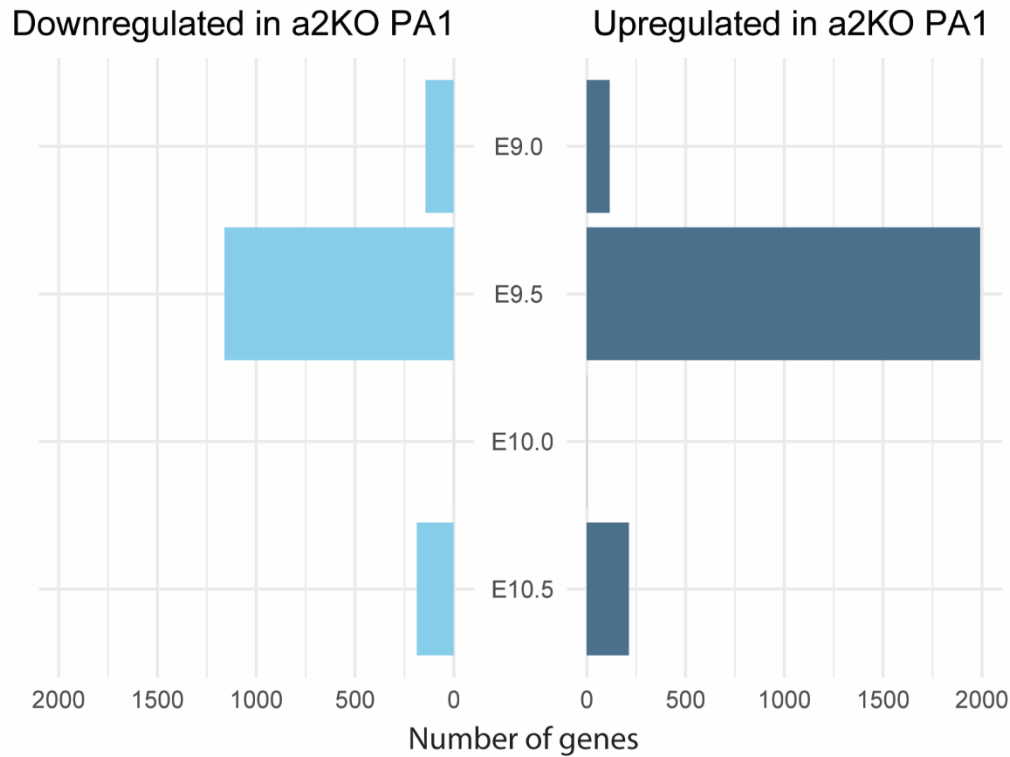

629

630 **Supplementary Figure S5.** Bar plot showing genes differentially expressed in bRNAseq between  
631 WT PA1 and *a2KO* PA1 across timepoints.

632

633 In considering alternatives to a ground state model, one concern in studying a  
634 heterogeneous sample, such as the PA, using bRNAseq is the noise inherent in the system, with  
635 gene expression changes potentially amplified or lost for our tissue of interest (NCCs) because  
636 of reads from another tissue. It is possible that a small set of cells, or a small set of genes are  
637 responsible for the phenotypic transformation observed in *a2KO* PA2, which would not shift the  
638 general transcriptome of the entire PA. Consistent with this idea, previous work indicates that  
639 different cells may respond to *Hoxa2* expression in different ways – with distinct requirements  
640 for levels and timing of *Hoxa2* expression within NCCs (Ohnemus et al. 2001; Santagati et al.  
641 2005).

642

643

644 scRNAseq reveals heterogeneity of differentiating NCC populations in the mouse embryo

645 In recent years, scRNAseq experiments have been used to shed light on the dynamics of  
646 embryonic development, from whole-embryo studies (Cao et al. 2019; Soldatov et al. 2019) to  
647 in-depth characterization of particular developmental processes (Xu et al. 2019; Tambalo et al.  
648 2020). Here, we took advantage of this approach to explore the heterogeneity of the PAs and  
649 characterize the role of HOXA2 in imparting PA2 NCC identity at single-cell resolution. We  
650 focused our analysis on E10.5, the start of NCC differentiation, due to the strong effects of  
651 HOXA2 observed in our bRNAseq analysis and previous work characterizing HOXA2 activity at  
652 this timepoint (Santagati et al. 2005; Donaldson et al. 2012; Amin et al. 2015). We generated  
653 transcriptional profiles for 67,674 cells across our four samples (PA1 and PA2 from WT and  
654 *a2KO* embryos), which aligned into 11 clusters, four of which correspond to NCCs. We focused  
655 primarily on uncommitted NCCs (cluster 1) and NCC-derived bone and cartilage (clusters 2-4),  
656 which together comprise 80.2% of the total cells isolated.

657 Our data show strong patterns in the expression of both proximal-distal and rostral-  
658 caudal markers in clusters 2-4 consistent with previously published observations (Xu et al.  
659 2019). This suggests that the clustering, a reflection of transcriptional similarity between cells,  
660 is informed by the location of NCCs within the PA (Fig. 4A-B). Moreover, the expression of  
661 chondrogenic markers *Sox9* and *Col2a1* is similar between WT PA1 and PA2, while osteogenic  
662 markers *Msx1* and *Msx2* are enriched in PA1 (Fig. 4C), consistent with the formation of cartilage  
663 in both tissues but bone primarily in PA1 (Dash and Trainor 2020). This trend is consistent in  
664 *a2KO* embryos (Supplementary Fig. S3), implying that intramembranous ossification is not  
665 increased in *a2KO* PA2 at this point in development, although it likely is at a later point as  
666 duplicate PA1 bone structures are being formed in the arch.

667 Consistent with previous observations, we see *Hoxa2* expression throughout PA2,  
668 expressed primarily in NCCs and NCC-derived clusters (Fig. 4D-F). It is important to note that  
669 because of the structure of the *a2KO* mutant allele, *Hoxa2* transcript is produced in the  
670 homozygous null embryos, but not translated. This serves as a lineage tracer for *Hoxa2*-  
671 expressing cells and shows they are not lost in *a2KO* embryos, demonstrating that HOXA2 is not

672 required for their survival. Interestingly, we do not observe strict segregation of *Hoxa2*-  
673 expressing cells and *Sox9*-expressing cells (Kanzler et al. 1998). This is potentially due to the  
674 collection of these cells early in the differentiation process, a pattern that is refined over the  
675 course of developmental time. The higher levels of *Hoxa2* expression at the proximal end of the  
676 NCC-derived bone/cartilage clusters are also consistent with previous observations that the  
677 proximo-caudal portions of PA2 require higher levels of HOXA2 for proper skeletal development  
678 (Ohnemus et al. 2001).

679

680 Behavior of PA-specific transcriptional signatures in WT and *a2KO* embryos indicates lack of a  
681 molecular NCC ground state

682 Based on bRNAseq transcriptomes of PA1 and PA2 in WT embryos at E10.5, we utilized  
683 differential expression analysis to identify a set of genes enriched in PA1, referred to as the PA1  
684 transcriptional signature, and a set of genes enriched in PA2, referred to as the PA2  
685 transcriptional signature. By establishing a reference set of genes characteristic of each PA in  
686 WT embryos, we provided a framework for comparison to determine how tissue identity  
687 changes in the absence of HOXA2. We also used this as a reference to shed light on the  
688 molecular mechanisms of HOXA2 activity and characterize the molecular underpinnings of the  
689 *Hox*-free PA1 phenotypic ground state and how it is altered in *Hoxa2*<sup>-/-</sup> embryos.

690 Based on the phenotypic transformation of PA2 NCC derivatives to duplicate PA1  
691 structures in the absence of HOXA2 (Minoux et al. 2009), we expect an accompanying  
692 transformation of the *a2KO* PA2 transcriptome to a PA1-like molecular ground state. However,  
693 the PA1 and PA2 signatures in both our bRNAseq and scRNAseq datasets revealed a retention  
694 of the general PA2 signature and a lack of upregulation of PA1 signature genes in PA2 of *a2KO*,  
695 embryos (Fig. 5). These data strongly suggest the absence of a true molecular NCC ground state  
696 that is globally altered by *Hoxa2* expression in PA2 NCCs. The resolution afforded by scRNAseq  
697 in this context enables us to identify transcriptional changes regardless of potential tissue  
698 heterogeneity and noise and illustrates its value in evaluating models surrounding the  
699 molecular basis of developmental and evolutionary phenotypes.

700 Our observations are consistent with a published comparison of mouse NCCs at E10.5  
701 from WT PA1, WT PA2, and PA1 with ectopic *Hoxa2* expression (Minoux et al. 2017). In that  
702 study, *Hoxa2* expression alters the PA1 transcriptional profile, but *Hoxa2*-expressing PA1 NCCs  
703 do not cluster with WT PA2 cells, as would be expected if HOXA2 was sufficient to drive a  
704 molecular transformation corresponding to the phenotypic one (Kitazawa et al. 2015). The  
705 effects of HOXA2 in PA2 specification appear to be more subtle than expected, giving a glimpse  
706 into what appears to be a complex regulatory picture consisting of cross-regulation with other  
707 *Hox* genes (Tümpel et al. 2007), cofactors such as *Pbx* and *Meis* (Amin et al. 2015; Parker et al.  
708 2019), axial signaling programs such as FGF (Trainor et al. 2002), and epigenetic regulation  
709 (Minoux et al. 2017). Although the effect of *Hoxa2* knockout (Fig. 2C & Fig. 5) or overexpression  
710 (Minoux et al. 2017) on the average transcriptome of NCCs is limited in scope, it nevertheless  
711 results in a dramatic phenotypic transformation. Our scRNAseq dataset reveals that subsets of  
712 *a2KO* PA2 NCCs do show reduction in expression of PA2 signature genes and upregulation of  
713 PA1 signature genes, suggesting that a molecular transformation may be occurring on a limited  
714 scale. This prompted us to further investigate the heterogeneity of NCCs and their response to  
715 HOXA2.

716

### 717 HOXA2 imparts PA2 identity in subsets of NCCs

718 Several studies have now looked at transcriptional differences between PA1 and PA2 in  
719 mouse embryos at various stages, seeking to identify key characteristics and components in  
720 establishment of axial identity (Brunskill et al. 2014; Lumb et al. 2017; Minoux et al. 2017).  
721 Other studies have identified a small set of genes regulated by *Hoxa2* within NCCs (Kanzler et  
722 al. 1998; Santagati et al. 2005; Kirilenko et al. 2011; Donaldson et al. 2012; Minoux et al. 2013).  
723 Despite these extensive efforts and the known role of HOXA2 in specifying NCC axial identity,  
724 the link between HOXA2 activity and PA2 fate has not been well characterized at this point.  
725 Here, we identified *Hoxa2*-responsive axial specifiers for both PA1 and PA2. In addition to  
726 finding a number of novel candidates, several of the genes we identified have been previously  
727 shown to have an axial-specific bias and others to respond to HOXA2 activity. Our analyses



728 describing putative *Hoxa2*-responsive axial specifiers establish new regulatory links between  
729 these genes and the regulatory network governing the specification of NCC identity. This  
730 provides functional and mechanistic insights into the role of HOXA2 in the establishment of NCC  
731 axial identity.

732 PA1 specifiers are strongly enriched for translation and related processes  
733 (Supplementary Table S15). There is increasing evidence from studies on craniofacial  
734 abnormalities in humans and vertebrate model systems that it is important to maintain the  
735 proper balance of ribosome biogenesis in cranial NCCs (Dixon et al. 2006; Jones et al. 2008;  
736 Weaver et al. 2015; Terrazas et al. 2017; Watt et al. 2018). Moreover, individual genes such as  
737 *Npm1* that emerge as putative HOXA2-repressed PA1 specifiers have been implicated in  
738 processes including epithelial-to-mesenchymal transition, such as that observed when NCCs  
739 delaminate from the neural tube to begin migration (Prakash et al. 2019). In contrast, PA2  
740 specifiers are largely enriched for developmental processes and morphogenesis, with many of  
741 the identified genes acting as transcription factors (Supplementary Table S16). It is encouraging  
742 that we identify genes previously implicated in NCC-related processes, such as *Nr2f1* (Fig. 6D),  
743 as well as genes shown to play a role in middle ear development, such as *Tshz1* (Fig. 6E), which  
744 have not previously been connected to *Hox* gene activity. These connections enable us to  
745 identify specific developmental processes through which *Hoxa2* likely acts to impart PA2  
746 identity.

747 The differences observed between specifiers of PA1 and PA2 likely speak to the  
748 processes occurring at different axial levels at this time. The enrichment for ribosomal  
749 components in PA1 may suggest higher levels of proliferation in this tissue, a hypothesis  
750 supported by the fact that the skeletal structures derived from PA1 NCCs are significantly larger  
751 than those in PA2, thus requiring a greater expansion of the NCC population. Moreover, there  
752 may be differences in developmental timing between PA1 and PA2, with PA1 forming earlier  
753 than PA2, resulting in the gene expression differences observed in our data.

754 The advent of genomic tools to address questions in developmental biology marks a  
755 shift in our approach to characterizing phenotypes and the activity of individual genes. These

756 data provide opportunities to explore the correlation, or lack thereof, between phenotypic  
757 effects and the underlying transcriptional differences that lead to them. Studies are beginning  
758 to emerge that draw a distinction between morphological and molecular phenotypes (Dooley et  
759 al. 2019). Likewise, here we show that the striking phenotypic ground state of mouse NCCs is  
760 nonetheless not accompanied by a corresponding molecular ground state (Fig. 6F). In light of  
761 the differences we observe in transcriptional regulation between subsets of NCCs, it would be  
762 invaluable to determine whether there are corresponding changes in HOXA2 occupancy within  
763 the genome that correlate with them. Though we integrated a previously published dataset of  
764 HOXA2 binding in PA2 (Donaldson et al. 2012), the rapid development of low-input, high-  
765 resolution methods to assay transcription factor binding such as Cut & Run (Hainer and Fazio  
766 2019) and CHIPmentation (Schmidl et al. 2015) will likely prove a meaningful step toward  
767 identifying such correlations at higher resolution and with more confidence. Furthermore,  
768 recent data show strong epigenetic differences between craniofacial tissues across axial levels  
769 (Minoux et al. 2017). The relationships between these *cis*-regulatory features, HOXA2 binding,  
770 and the transcriptional status of subsets of NCCs will provide a wealth of data toward  
771 understanding axial-specific processes.

772

## 773 **Materials and Methods**

### 774 Mouse husbandry and embryo collection

775 All mouse work was performed in the Laboratory Animal Services Facility at the Stowers  
776 Institute for Medical Research under IACUC approved protocols RK-2016-0164 and RK-2019-  
777 094. Euthanasia procedures were performed in accordance with recommendations by the  
778 American Veterinary Medical Association. All mice used in this study were maintained on a  
779 CBA/Ca/J x C57BL/10 background.

780

### 781 CRISPR-Cas9 mutation to create Hoxa2-ATG-XhoI mouse line

782 A CRISPR-Cas9 gene editing approach was developed to mutate a 7 bp region including part of  
783 the start codon of HOXA2 (5'-AGGCC**ATG-3'**), by deleting 2 bp and converting it into an XhoI site  
784 (5'-CTCGAG**-3'**) – hereafter referred to as the *a2KO* allele. A chimeric guide RNA was designed  
785 to target the start codon of HOXA2, consisting of the oligos 5'-  
786 CACCGCCGAGGGGGCTCCAAGGAGA-3' and 5'-AAACTCTCCTTGGAGCCCCCTCGGC-3', which were  
787 annealed and ligated into the pX330 plasmid (Cong et al. 2013). Together with a homology oligo  
788 (5'-  
789 CTTGCCCCC**AAAG**CCCCTCCAAAGAGGGA**ACTTTT**CCTCCGAGGGGGCTCCAAGGAG**ACTCGAGAA**  
790 TTACGAATTTGAGCGAGAGATTGGTTTTATCAATAGCCAGCCGTCGCTCGCTGAGTGC-3'), the pX330  
791 plasmid was microinjected into one-cell CBA/Ca/J x C57BL/10 embryos collected from  
792 superovulated donor mice. The next day, surviving two-cell embryos were transferred into  
793 pseudopregnant CBA/Ca/J x C57BL/10 females and genotyped upon weaning. Founders were  
794 maintained on this background.

795

### 796 Bulk RNAseq preparation and sequencing

797 Embryos were collected from heterozygous *a2KO* matings at approximately E9.0, E9.5, E10.0,  
798 and E10.5, with the day of identification of a vaginal plug defined as E0.5. The number of somite

799 pairs were counted to more accurately stage each embryo and their yolk sacs used to  
800 determine genotype. To minimize variation in staging between individual embryos, we  
801 narrowly defined the number of somites appropriate for each stage (E9.0: 16-17 somites, E9.5:  
802 22-24 somites, E10.0: 28-29 somites, E10.5: 35-36 somites) and only used wildtype (WT) or  
803 homozygous *a2KO* mutant embryos falling within the respective ranges. PA1 and PA2 were  
804 individually isolated from each embryo by manual dissection in ice-cold phosphate-buffered  
805 saline (PBS), flash frozen in liquid nitrogen, and then stored at -80 °C. Following genotyping,  
806 Ambion TRIzol (catalog number 15596026) was added to each frozen sample, vortexed to  
807 homogenize, and the Zymo Research Direct-zol mini-prep kit (catalog number R2052) with on-  
808 column DNase treatment was used to extract RNA. This was performed for PA1 and PA2 of  
809 individual embryos, resulting in 3-5 WT and *a2KO* biological replicates at each developmental  
810 timepoint.

811 RNA quantification and quality control were performed using an Agilent 2100 Bioanalyzer. All  
812 samples had RIN scores >9.0. The Takara Clontech SMART-seq v4 ultra low input RNA kit  
813 (catalog number 634891), Illumina Nextera XT Library prep kit (catalog number FC-131-1096),  
814 and Illumina Nextera XT Index kit (catalog number FC-131-2001) were used for polyA-selected  
815 cDNA preparation and library construction. Library quality was checked using an Agilent 2100  
816 Bioanalyzer, then pooled and loaded onto five lanes of an Illumina HiSeq flow cell to sequence  
817 50 bp single reads for a total of 20-30X genomic coverage.

818

### 819 Bulk RNAseq data analysis

820 Reads were aligned to mm10 (Ensembl 91) using Tophat 2.1.1 (Kim et al. 2013). Downstream  
821 analysis was performed in R 3.3.2 using EdgeR quasi-likelihood pipeline 1.4.1 (Chen et al. 2016)  
822 for differential expression analysis with default settings. Differentially expressed genes between  
823 samples were called with adjusted  $p < 0.05$ .

824

825

826 Single-cell RNAseq preparation and sequencing

827 Homozygous *a2KO* mutant embryos do not display obvious morphological phenotypes at E10.5  
828 that would enable them to be distinguishable from wildtype or heterozygous littermates.  
829 Hence, it was necessary to develop a rapid genotyping method to identify wildtype and  
830 homozygous *a2KO* embryos which is also compatible with subsequent processing steps for  
831 scRNAseq experiments. Mouse embryos were collected with their extra-embryonic membranes  
832 intact at E10.5 from *a2KO* heterozygous matings and kept in Tyrode's Solution (8.0g NaCl, 0.2g  
833 KCl, 0.2g CaCl<sub>2</sub>, 0.21g MgCl<sub>2</sub>\*6H<sub>2</sub>O, 0.57g NaH<sub>2</sub>PO<sub>4</sub>\*H<sub>2</sub>O, 1.0g glucose, 1.0g NaHCO<sub>3</sub> per 1L  
834 DEPC treated H<sub>2</sub>O, pH 7.4) at room temperature until ready to proceed with dissections of the  
835 PAs. Approximately 1 mm<sup>2</sup> piece of the yolk sac was collected for each embryo and genotyped  
836 using ThermoFisher Phire Tissue Direct PCR Master Mix Kit (catalog number F170S) to rapidly  
837 identify homozygous *a2KO* embryos. WT embryos were collected at E10.5 from CBA/Ca/J x  
838 C57BL/10 matings.

839 PAs from homozygous *a2KO* (n = 5) and WT (n = 6) embryos were manually dissected in ice-cold  
840 DEPC-treated phosphate-buffered saline (DPBS, Sigma catalog number D8537). Individual PAs  
841 were pooled into four samples (WT PA1, WT PA2, *a2KO* PA1, *a2KO* PA2) and pooled samples  
842 dissociated by incubation in 0.25% Trypsin + EDTA (Gibco catalog number 25200-056) for 3  
843 minutes with two rounds of manual disruption by pipetting. The reaction was stopped with  
844 fetal bovine serum and samples were washed two times in DPBS. Single-cell suspensions were  
845 loaded on a Nexelome Cellometer Auto T4 to assess cell count and viability. All samples had  
846 >90% viability and were loaded on a 10X Chromium Single Cell Controller. Libraries were  
847 prepared using the Chromium Single Cell 3' Reagents Kits v3 (CG000183 Rev A). Library quality  
848 was checked on an Agilent 2100 Bioanalyzer, then pooled and loaded onto two Illumina  
849 NovaSeq S1 flow cells to sequence paired reads consisting of: 28 bp cell barcode & UMI, 8 bp i7  
850 index, and 91 bp read. All samples were sequenced to a read depth >60,000 reads/cell.

851

852

853

#### 854 Single-cell RNAseq data analysis

855 Reads were aligned to mm10 (Ensembl 98) using CellRanger 3.0.0. Downstream analysis was  
856 performed in R 3.5.2 using Seurat 3.1.0 (Butler et al. 2018; Stuart et al. 2019). Cells were  
857 removed from analysis if they had mitochondrial percentage greater than 5% or fewer than 200  
858 genes expressed. DoubletFinder 2.0 (McGinnis et al. 2019) was used to remove ~20% of cells  
859 identified as doublets (based on extrapolation of 10X Chromium reported multiplets for a given  
860 number of recovered cells). After this final filtering step, a total of 67,674 cells remained for  
861 downstream analysis. Further analysis was performed on these cells using the standard Seurat  
862 Integration pipeline, with 2000 variable features and 40 principal components used for uniform  
863 manifold approximation and projection (UMAP) and clustering (at resolution = 0.5). Cluster  
864 identity was assigned based on marker genes identified using FindAllMarkers() function with a  
865 minimum of 10% of cells expressing a gene and log fold change greater than 0.25, using marker  
866 genes annotated in (Cao et al. 2019). Exploration of cell spatial distribution was performed via  
867 analysis of genes described in (Xu et al. 2019). To identify genes differentially expressed  
868 between samples, the FindMarkers() function was used on a cluster-by-cluster basis to make  
869 pairwise comparisons between samples, with a minimum of 10% of cells expressing a gene and  
870 log fold change greater than 0.10.

871

#### 872 Gene ontology and pathway analysis

873 For lists of genes of interest, gProfiler g:GOST functional enrichment analysis was used to obtain  
874 GO, KEGG, and other functional characterization in R3.6.1 using gprofiler2 version 0.1.9 with a  
875 statistical significance threshold of  $p < 0.05$ . Further information on gProfiler methodology is  
876 described in (Raudvere et al. 2019).

877

#### 878 In situ hybridization

879 Mouse embryos homozygous for the *a2KO* mutation and WT littermates were collected at  
880 E10.5 and fixed overnight in 4% paraformaldehyde in PBS. Probe generation and hybridization

881 performed as previously described (Ariza-McNaughton and Krumlauf 2002). Primers used to  
882 generate probes for *Hoxa2* targets from cDNA as follows:

| Gene         | Forward Primer       | Reverse Primer       |
|--------------|----------------------|----------------------|
| <i>Prrx1</i> | CGGCACAAGCAGACGAAAG  | AGTAGCCATGGCGCTGTACG |
| <i>Nr2f1</i> | AACGGGGATCCTCTCAATGG | TGAAACTGCTCCCTGACAGC |
| <i>Tshz1</i> | GTAGAGAAGGTCACGGGCAA | GCCCGTGAACCTGGAGATG  |

883 Each gene was assayed in 4-10 embryos of each genotype and only those with consistent  
884 patterns were considered significant. Z-stack images were acquired with a Leica MZ16  
885 stereomicroscope and subsequently processed with Helicon Focus 6.8.0 software (Helicon Soft  
886 Ltd.) to create a projection of all images into a single high-focus photo.

887

#### 888 Skeletal staining

889 Mouse embryos heterozygous or homozygous for the *a2KO* allele along with WT littermates  
890 were collected at E18.5, euthanized in PBS on ice for 1 hour, and then fixed and stored in ice  
891 cold 100% ethanol. Staining with Alcian Blue and Alizarin Red was performed as previously  
892 described (Rigueur and Lyons 2014).

893

#### 894 **Data Availability**

895 The bulk and single-cell RNAseq data generated as part of this manuscript have been deposited  
896 into the National Center for Biotechnology Information Gene Expression Omnibus (NCBI GEO)  
897 database – accession number GSE164111. Files generated during analysis have been included  
898 as Supplementary Tables where deemed appropriate. Original data underlying this manuscript  
899 can be accessed from the Stowers Original Data Repository at  
900 <http://www.stowers.org/research/publications/libpb-1598>.



901 **Supplementary Table Legends**

902 Table S1. Summary table of genes differentially expressed in bRNAseq data between WT PA1  
903 and WT PA2 across timepoints.

904 Table S2. Results of differential expression analysis from bRNAseq data between WT PA1 and  
905 WT PA2 at E9.0 including adjusted p-value and log(fold change).

906 Table S3. Results of differential expression analysis from bRNAseq data between WT PA1 and  
907 WT PA2 at E9.5 including adjusted p-value and log(fold change).

908 Table S4. Results of differential expression analysis from bRNAseq data between WT PA1 and  
909 WT PA2 at E10.0 including adjusted p-value and log(fold change).

910 Table S5. Results of differential expression analysis from bRNAseq data between WT PA1 and  
911 WT PA2 at E10.5 including adjusted p-value and log(fold change).

912 Table S6. Summary table of genes differentially expressed in bRNAseq data between WT PA2  
913 and *a2KO* PA2 across timepoints.

914 Table S7. Results of differential expression analysis from bRNAseq data between WT PA2 and  
915 *a2KO* PA2 at E9.0 including adjusted p-value and log(fold change).

916 Table S8. Results of differential expression analysis from bRNAseq data between WT PA2 and  
917 *a2KO* PA2 at E9.5 including adjusted p-value and log(fold change).

918 Table S9. Results of differential expression analysis from bRNAseq data between WT PA2 and  
919 *a2KO* PA2 at E10.0 including adjusted p-value and log(fold change).

920 Table S10. Results of differential expression analysis from bRNAseq data between WT PA2 and  
921 *a2KO* PA2 at E10.5 including adjusted p-value and log(fold change).

922 Table S11. Marker genes for all clusters in scRNAseq dataset at E10.5.

923 Table S12. Genes corresponding to PA1 and PA2 transcriptional signatures based on WT PA1 vs.  
924 WT PA2 differential expression analysis.

925 Table S13. Putative *Hoxa2*-repressed PA1 specifiers. Genes identified from bRNAseq, as well as  
926 scRNAseq clusters 1-4. For each gene, 1 corresponds to being statistically significant in a given  
927 dataset, 0 indicates not significant. In the last column, B indicates it is the nearest gene to a  
928 HOXA2 binding site from (Donaldson et al. 2012), N indicates that it is not.

929 Table S14. Putative *Hoxa2*-activated PA2 specifiers. Genes identified from bRNAseq, as well as  
930 scRNAseq clusters 1-4. For each gene, 1 corresponds to being statistically significant in a given  
931 dataset, 0 indicates not significant. In the last column, B indicates it is the nearest gene to a  
932 HOXA2 binding site from (Donaldson et al. 2012), N indicates that it is not.

933 Table S15. GO terms for putative *Hoxa2*-repressed PA1 specifiers.

934 Table S16. GO terms for putative *Hoxa2*-activated PA2 specifiers.

935 Table S17. Summary table of genes differentially expressed in bRNAseq data between WT PA1  
936 and *a2KO* PA1 across timepoints.

937 Table S18. Results of differential expression analysis from bRNAseq data between WT PA1 and  
938 *a2KO* PA1 at E9.0 including adjusted p-value and log(fold change).

939 Table S19. Results of differential expression analysis from bRNAseq data between WT PA1 and  
940 *a2KO* PA1 at E9.5 including adjusted p-value and log(fold change).

941 Table S20. Results of differential expression analysis from bRNAseq data between WT PA1 and  
942 *a2KO* PA1 at E10.0 including adjusted p-value and log(fold change).

943 Table S21. Results of differential expression analysis from bRNAseq data between WT PA1 and  
944 *a2KO* PA1 at E10.5 including adjusted p-value and log(fold change).

945

## 946 **Acknowledgements**

947 We are grateful to members of the Krumlauf lab for extensive discussion of this work, especially  
948 Christof Nolte who assisted with generation of the *a2KO* mice. We are also grateful to William  
949 Munoz for assistance with imaging *in situ* hybridization in embryos. We appreciate the  
950 assistance of Jason Morrison and Paul Kulesa in getting single-cell RNAseq working in our  
951 system. We thank Heidi Monin, Kathleen Zapien, and other members of the Laboratory Animal  
952 Services staff at SIMR for maintaining and caring for the mice used in this study. We thank  
953 Allison Peak and other members of the Sequencing and Discovery Genomics facility for 10X  
954 Chromium setup and utilization, library preparation, and sequencing services. We thank  
955 Madelaine Gogol and Chris Seidel for support and assistance with data analysis as well as the  
956 Computational Genomics core for preliminary data preparation. We are grateful to Mark Miller  
957 for illustration and figure preparation. We would also like to acknowledge the University of  
958 Kansas Medical Center Genomics Core for sequencing support, as well as the *Kansas Intellectual  
959 and Developmental Disabilities Research Center (NIH U54 HD 090216)*, the *Molecular  
960 Regulation of Cell Development and Differentiation – COBRE (P30 GM122731-03)* and the *NIH  
961 S10 High-End Instrumentation Grant (NIH S10OD021743)* at the University of Kansas Medical  
962 Center, Kansas City, KS 66160. Research reported in this publication was supported by the  
963 National Institute of Dental & Craniofacial Research of the National Institutes of Health under  
964 Award Number F31DE028469 to IP. The content is solely the responsibility of the authors and  
965 does not necessarily represent the official views of the National Institutes of Health. This  
966 research is also supported by grants from the Stowers Institute for Medical Research to RK  
967 (#1001) and PAT (#1008). This work was performed to fulfill, in part, requirements for IP's thesis  
968 research in the Graduate School of the Stowers Institute for Medical Research.

969

## 970 **Competing Interests**

971 IP: Supported by Graduate School of the Stowers Institute for Medical Research and NIH F31.  
972 PAT: Employed and research funded by Stowers Institute for Medical Research; Stipend from  
973 American Association of Anatomists for being Editor-in-Chief of *Developmental Dynamics*.

974 RK: Employed and research funded by Stowers Institute for Medical Research; Member of  
975 Scientific Review Board of Howard Hughes Medical Institute; Member of the Board of Directors  
976 of the Society for Developmental Biology; Co-inventor listed on patents licensed by the Stowers  
977 Institute to Amgen for a drug to regulate bone density.

978

## 979 References

- 980 Alexander T, Nolte C, Krumlauf R. 2009. Hox genes and segmentation of the hindbrain and axial  
981 skeleton. *Annu Rev Cell Dev Biol* **25**: 431-456.
- 982 Amin S, Donaldson IJ, Zannino DA, Hensman J, Rattray M, Losa M, Spitz F, Ladam F, Sagerstrom C, Bobola  
983 N. 2015. Hoxa2 selectively enhances Meis binding to change a branchial arch ground state. *Dev*  
984 *Cell* **32**: 265-277.
- 985 Ariza-McNaughton L, Krumlauf R. 2002. Non-radioactive in situ hybridization: simplified procedures for  
986 use in whole-mounts of mouse and chick embryos. *Int Rev Neurobiol* **47**: 239-250.
- 987 Barske L, Rataud P, Behizad K, Del Rio L, Cox SG, Crump JG. 2018. Essential Role of Nr2f Nuclear  
988 Receptors in Patterning the Vertebrate Upper Jaw. *Dev Cell* **44**: 337-347 e335.
- 989 Bobola N, Carapuco M, Ohnemus S, Kanzler B, Leibbrandt A, Neubuser A, Drouin J, Mallo M. 2003.  
990 Mesenchymal patterning by Hoxa2 requires blocking Fgf-dependent activation of Ptx1.  
991 *Development* **130**: 3403-3414.
- 992 Brunskill EW, Potter AS, Distasio A, Dexheimer P, Plassard A, Aronow BJ, Potter SS. 2014. A gene  
993 expression atlas of early craniofacial development. *Dev Biol* **391**: 133-146.
- 994 Butler A, Hoffman P, Smibert P, Papalexi E, Satija R. 2018. Integrating single-cell transcriptomic data  
995 across different conditions, technologies, and species. *Nat Biotechnol* **36**: 411-420.
- 996 Cao J, Spielmann M, Qiu X, Huang X, Ibrahim DM, Hill AJ, Zhang F, Mundlos S, Christiansen L, Steemers FJ  
997 et al. 2019. The single-cell transcriptional landscape of mammalian organogenesis. *Nature* **566**:  
998 496-502.
- 999 Carroll SB. 1995. Homeotic genes and the evolution of arthropods and chordates. *Nature* **376**: 479-485.
- 1000 Chen Y, Lun AT, Smyth GK. 2016. From reads to genes to pathways: differential expression analysis of  
1001 RNA-Seq experiments using Rsubread and the edgeR quasi-likelihood pipeline. *F1000Res* **5**:  
1002 1438.
- 1003 Cong L, Ran FA, Cox D, Lin S, Barretto R, Habib N, Hsu PD, Wu X, Jiang W, Marraffini LA et al. 2013.  
1004 Multiplex genome engineering using CRISPR/Cas systems. *Science* **339**: 819-823.
- 1005 Coré N, Caubit X, Metchat A, Boned A, Djabali M, Fasano L. 2007. Tshz1 is required for axial skeleton,  
1006 soft palate and middle ear development in mice. *Dev Biol* **308**: 407-420.
- 1007 Couly G, Grapin-Botton A, Coltey P, Ruhin B, Le Douarin NM. 1998. Determination of the identity of the  
1008 derivatives of the cephalic neural crest: incompatibility between Hox gene expression and lower  
1009 jaw development. *Development* **128**: 3445-3459.
- 1010 Couly GF, Coltey PM, Le Douarin NM. 1993. The triple origin of skull in higher vertebrates- a study in  
1011 quail-chick chimeras. *Development* **117**: 409-429.
- 1012 Crane JF, Trainor PA. 2006. Neural crest stem and progenitor cells. *Annu Rev Cell Dev Biol* **22**: 267-286.
- 1013 Dash S, Trainor PA. 2020. The development, patterning and evolution of neural crest cell differentiation  
1014 into cartilage and bone. *Bone* **137**: 115409.
- 1015 De Kumar B, Parker HJ, Parrish ME, Lange JJ, Slaughter BD, Unruh JR, Paulson A, Krumlauf R. 2017.  
1016 Dynamic regulation of Nanog and stem cell-signaling pathways by Hoxa1 during early neuro-  
1017 ectodermal differentiation of ES cells. *Proc Natl Acad Sci U S A* **114**: 5838-5845.
- 1018 Dixon J, Jones NC, Sandell LL, Jayasinghe SM, Crane J, Rey JP, Dixon MJ, Trainor PA. 2006. Tcof1/Treacle  
1019 is required for neural crest cell formation and proliferation deficiencies that cause craniofacial  
1020 abnormalities. *Proc Natl Acad Sci U S A* **103**: 13403-13408.
- 1021 Donaldson IJ, Amin S, Hensman JJ, Kutejova E, Rattray M, Lawrence N, Hayes A, Ward CM, Bobola N.  
1022 2012. Genome-wide occupancy links Hoxa2 to Wnt-beta-catenin signaling in mouse embryonic  
1023 development. *Nucleic Acids Res* **40**: 3990-4001.

- 1024 Dooley CM, Wali N, Sealy IM, White RJ, Stemple DL, Collins JE, Busch-Nentwich EM. 2019. The gene  
1025 regulatory basis of genetic compensation during neural crest induction. *PLoS Genet* **15**:  
1026 e1008213.
- 1027 Etchevers HC, Dupin E, Le Douarin NM. 2019. The diverse neural crest: from embryology to human  
1028 pathology. *Development* **146**.
- 1029 Gammill LS, Bronner-Fraser M. 2002. Genomic analysis of neural crest induction. *Development* **129**:  
1030 5731-5741.
- 1031 Gendron-Maguire M, Mallo M, Zhang M, Gridley T. 1993. Hoxa-2 mutant mice exhibit homeotic  
1032 transformation of skeletal elements derived from cranial neural crest. *Cell* **75**: 1317-1331.
- 1033 Grammatopoulos GA, Bell E, Toole L, Lumsden A, Tucker AS. 2000. Homeotic transformation of branchial  
1034 arch identity after Hoxa2 overexpression. *Development* **127**: 5355-5365.
- 1035 Green SA, Simoes-Costa M, Bronner ME. 2015. Evolution of vertebrates as viewed from the crest. *Nature*  
1036 **520**: 474-482.
- 1037 Hainer SJ, Fazio TG. 2019. High-Resolution Chromatin Profiling Using CUT&RUN. *Curr Protoc Mol Biol*  
1038 **126**: e85.
- 1039 Hunt P, Gulisano M, Cook M, Sham MH, Faiella A, Wilkinson D, Boncinelli E, Krumlauf R. 1991. A distinct  
1040 Hox code for the branchial region of the vertebrate head. *Nature* **353**: 861-864.
- 1041 Hunter MP, Prince VE. 2002. Zebrafish hox paralogue group 2 genes function redundantly as selector  
1042 genes to pattern the second pharyngeal arch. *Dev Biol* **247**: 367-389.
- 1043 Jones NC, Lynn ML, Gaudenz K, Sakai D, Aoto K, Rey JP, Glynn EF, Ellington L, Du C, Dixon J et al. 2008.  
1044 Prevention of the neurocristopathy Treacher Collins syndrome through inhibition of p53  
1045 function. *Nat Med* **14**: 125-133.
- 1046 Kanzler B, Kuschert SJ, Liu Y-H, Mallo M. 1998. *Hoxa2* restricts the chondrogenic domain and inhibits  
1047 bone formation during development of the branchial area. *Development* **125**: 2587-2597.
- 1048 Kim D, Perteza G, Trapnell C, Pimentel H, Kelley R, Salzberg SL. 2013. TopHat2: accurate alignment of  
1049 transcriptomes in the presence of insertions, deletions and gene fusions. *Genome Biol* **14**: R36.
- 1050 Kirilenko P, He G, Mankoo BS, Mallo M, Jones R, Bobola N. 2011. Transient activation of meox1 is an  
1051 early component of the gene regulatory network downstream of hoxa2. *Molecular and cellular*  
1052 *biology* **31**: 1301-1308.
- 1053 Kitazawa T, Fujisawa K, Narboux-Neme N, Arima Y, Kawamura Y, Inoue T, Wada Y, Kohro T, Aburatani H,  
1054 Kodama T et al. 2015. Distinct effects of Hoxa2 overexpression in cranial neural crest  
1055 populations reveal that the mammalian hyomandibular-ceratothyal boundary maps within the  
1056 styloid process. *Dev Biol* **402**: 162-174.
- 1057 Knecht AK, Bronner-Fraser M. 2002. Induction of the neural crest: a multigene process. *Nat Rev Genet* **3**:  
1058 453-461.
- 1059 Kontges G, Lumsden A. 1996. Rhombencephalic neural crest segmentation is preserved throughout  
1060 craniofacial ontogeny. *Development* **122**: 3229-3242.
- 1061 LaBonne C, Bronner-Fraser M. 1998. Induction and patterning of the neural crest, a stem cell-like  
1062 precursor population. *J Neurobiol* **36**: 175-189.
- 1063 LaBonne C, Bronner-Fraser M. 1999. Molecular mechanisms of neural crest formation. *Annu Rev Cell Dev*  
1064 *Biol* **15**: 81-112.
- 1065 Laing AF, Lowell S, Brickman JM. 2015. Gro/TLE enables embryonic stem cell differentiation by  
1066 repressing pluripotent gene expression. *Dev Biol* **397**: 56-66.
- 1067 Le Douarin N, Kalcheim C. 1999. *The Neural Crest*. Cambridge University Press, Cambridge, UK ; New  
1068 York, NY, USA.
- 1069 Lex A, Gehlenborg N, Strobel H, Vuillemot R, Pfister H. 2014. UpSet: Visualization of Intersecting Sets.  
1070 *IEEE Trans Vis Comput Graph* **20**: 1983-1992.

- 1071 Lumb R, Buckberry S, Secker G, Lawrence D, Schwarz Q. 2017. Transcriptome profiling reveals expression  
1072 signatures of cranial neural crest cells arising from different axial levels. *BMC Dev Biol* **17**: 5.  
1073 Maconochie M, Krishnamurthy R, Nonchev S, Meier P, Manzanares M, Mitchell PJ, Krumlauf R. 1999.  
1074 Regulation of *Hoxa2* in cranial neural crest cells involves members of the AP-2 family.  
1075 *Development* **126**: 1483-1494.  
1076 Maconochie MK, Nonchev S, Studer M, Chan SK, Popperl H, Sham MH, Mann RS, Krumlauf R. 1997.  
1077 Cross-regulation in the mouse *HoxB* complex: the expression of *Hoxb2* in rhombomere 4 is  
1078 regulated by *Hoxb1*. *Genes and Development* **11**: 1885-1896.  
1079 Mallo M, Wellik DM, Deschamps J. 2010. Hox genes and regional patterning of the vertebrate body plan.  
1080 *Dev Biol* **344**: 7-15.  
1081 Martik ML, Bronner ME. 2017. Regulatory Logic Underlying Diversification of the Neural Crest. *Trends in*  
1082 *genetics : TIG* **33**: 715-727.  
1083 Martik ML, Gandhi S, Uy BR, Gillis JA, Green SA, Simoes-Costa M, Bronner ME. 2019. Evolution of the  
1084 new head by gradual acquisition of neural crest regulatory circuits. *Nature* **574**: 675-678.  
1085 Martin JF, Bradley A, Olson EN. 1995. The paired-like homeo box gene *MHox* is required for early events  
1086 of skeletogenesis in multiple lineages. *Genes Dev* **9**: 1237-1249.  
1087 McEllin JA, Alexander TB, Tumpel S, Wiedemann LM, Krumlauf R. 2016. Analyses of fugu *hoxa2* genes  
1088 provide evidence for subfunctionalization of neural crest cell and rhombomere cis-regulatory  
1089 modules during vertebrate evolution. *Dev Biol* **409**: 530-542.  
1090 McGinnis CS, Murrow LM, Gartner ZJ. 2019. DoubletFinder: Doublet Detection in Single-Cell RNA  
1091 Sequencing Data Using Artificial Nearest Neighbors. *Cell Syst* **8**: 329-337 e324.  
1092 Minoux M, Antonarakis GS, Kmita M, Duboule D, Rijli FM. 2009. Rostral and caudal pharyngeal arches  
1093 share a common neural crest ground pattern. *Development* **136**: 637-645.  
1094 Minoux M, Holwerda S, Vitobello A, Kitazawa T, Kohler H, Stadler MB, Rijli FM. 2017. Gene bivalency at  
1095 Polycomb domains regulates cranial neural crest positional identity. *Science* **355**.  
1096 Minoux M, Kratochwil CF, Ducret S, Amin S, Kitazawa T, Kurihara H, Bobola N, Vilain N, Rijli FM. 2013.  
1097 Mouse *Hoxa2* mutations provide a model for microtia and auricle duplication. *Development* **140**:  
1098 4386-4397.  
1099 Minoux M, Rijli FM. 2010. Molecular mechanisms of cranial neural crest cell migration and patterning in  
1100 craniofacial development. *Development* **137**: 2605-2621.  
1101 Northcutt R, Gans C. 1983. The genesis of neural crest and epidermal placodes: a reinterpretation of  
1102 vertebrate origins. *Q Rev Biol* **58**: 1-28.  
1103 Ohnemus S, Bobola N, Kanzler B, Mallo M. 2001. Different levels of *Hoxa2* are required for particular  
1104 developmental processes. *Mechanisms of development* **108**: 135-147.  
1105 Parker HJ, Bronner ME, Krumlauf R. 2016. The vertebrate Hox gene regulatory network for hindbrain  
1106 segmentation: Evolution and diversification: Coupling of a Hox gene regulatory network to  
1107 hindbrain segmentation is an ancient trait originating at the base of vertebrates. *BioEssays :  
1108 news and reviews in molecular, cellular and developmental biology* **38**: 526-538.  
1109 Parker HJ, De Kumar B, Green SA, Prummel KD, Hess C, Kaufman CK, Mosimann C, Wiedemann LM,  
1110 Bronner ME, Krumlauf R. 2019. A Hox-TALE regulatory circuit for neural crest patterning is  
1111 conserved across vertebrates. *Nature communications* **10**: 1189.  
1112 Parker HJ, Krumlauf R. 2020. A Hox gene regulatory network for hindbrain segmentation. *Curr Top Dev  
1113 Biol* **139**: 169-203.  
1114 Parker HJ, Pushel I, Krumlauf R. 2018. Coupling the roles of Hox genes to regulatory networks patterning  
1115 cranial neural crest. *Dev Biol* **444 Suppl 1**: S67-S78.  
1116 Pasqualetti M, Ori M, Nardi I, Rijli FM. 2000. Ectopic *Hoxa2* induction after neural crest migration results  
1117 in homeosis of jaw elements in *Xenopus*. *Development* **127**: 5367-5378.



- 1118 Prakash V, Carson BB, Feenstra JM, Dass RA, Sekyrova P, Hoshino A, Petersen J, Guo Y, Parks MM, Kurylo  
1119 CM et al. 2019. Ribosome biogenesis during cell cycle arrest fuels EMT in development and  
1120 disease. *Nat Commun* **10**: 2110.
- 1121 Rada-Iglesias A, Bajpai R, Prescott S, Brugmann SA, Swigut T, Wysocka J. 2012. Epigenomic annotation of  
1122 enhancers predicts transcriptional regulators of human neural crest. *Cell Stem Cell* **11**: 633-648.
- 1123 Raudvere U, Kolberg L, Kuzmin I, Arak T, Adler P, Peterson H, Vilo J. 2019. g:Profiler: a web server for  
1124 functional enrichment analysis and conversions of gene lists (2019 update). *Nucleic Acids Res* **47**:  
1125 W191-W198.
- 1126 Rigueur D, Lyons KM. 2014. Whole-mount skeletal staining. *Methods Mol Biol* **1130**: 113-121.
- 1127 Rijli FM, Mark M, Lakkaraju S, Dierich A, Dollé P, Chambon P. 1993. A homeotic transformation is  
1128 generated in the rostral branchial region of the head by disruption of *Hoxa-2*, which acts as a  
1129 selector gene. *Cell* **75**: 1333-1349.
- 1130 Santagati F, Minoux M, Ren SY, Rijli FM. 2005. Temporal requirement of *Hoxa2* in cranial neural crest  
1131 skeletal morphogenesis. *Development* **132**: 4927-4936.
- 1132 Sauka-Spengler T, Meulemans D, Jones M, Bronner-Fraser M. 2007. Ancient evolutionary origin of the  
1133 neural crest gene regulatory network. *Developmental cell* **13**: 405-420.
- 1134 Schilling TF, Prince V, Ingham PW. 2001. Plasticity in zebrafish *hox* expression in the hindbrain and  
1135 cranial neural crest. *Dev Biol* **231**: 201-216.
- 1136 Schmidl C, Rendeiro AF, Sheffield NC, Bock C. 2015. ChIPmentation: fast, robust, low-input ChIP-seq for  
1137 histones and transcription factors. *Nat Methods* **12**: 963-965.
- 1138 Simoes-Costa M, Bronner ME. 2015. Establishing neural crest identity: a gene regulatory recipe.  
1139 *Development* **142**: 242-257.
- 1140 Soldatov R, Kauccka M, Kastriti ME, Petersen J, Chontorotzea T, Englmaier L, Akkuratova N, Yang Y, Häring  
1141 M, Dyachuk V et al. 2019. Spatiotemporal structure of cell fate decisions in murine neural crest.  
1142 *Science* **364**.
- 1143 Square T, Jandzik D, Romasek M, Cerny R, Medeiros DM. 2017. The origin and diversification of the  
1144 developmental mechanisms that pattern the vertebrate head skeleton. *Dev Biol* **427**: 219-229.
- 1145 Stuart T, Butler A, Hoffman P, Hafemeister C, Papalexi E, Mauck WM, 3rd, Hao Y, Stoeckius M, Smibert P,  
1146 Satija R. 2019. Comprehensive Integration of Single-Cell Data. *Cell* **177**: 1888-1902 e1821.
- 1147 Tambalo M, Mitter R, Wilkinson DG. 2020. A single cell transcriptome atlas of the developing zebrafish  
1148 hindbrain. *Development* **147**.
- 1149 Terrazas K, Dixon J, Trainor PA, Dixon MJ. 2017. Rare syndromes of the head and face: mandibulofacial  
1150 and acrofacial dysostoses. *Wiley interdisciplinary reviews Developmental biology* **6**.
- 1151 Trainor P, Krumlauf R. 2000a. Plasticity in mouse neural crest cells reveals a new patterning role for  
1152 cranial mesoderm. *Nature cell biology* **2**: 96-102.
- 1153 Trainor PA, Ariza-McNaughton L, Krumlauf R. 2002. Role of the isthmus and FGFs in resolving the  
1154 paradox of neural crest plasticity and prepatterning. *Science* **295**: 1288-1291.
- 1155 Trainor PA, Krumlauf R. 2000b. Patterning the cranial neural crest: Hindbrain segmentation and *Hox*  
1156 gene plasticity. *Nature reviews Neuroscience* **1**: 116-124.
- 1157 Trainor PA, Krumlauf R. 2001. *Hox* genes, neural crest cells and branchial arch patterning. *Current*  
1158 *Opinion in Cell Biology* **13**: 698-705.
- 1159 Tümpel S, Cambronero F, Ferretti E, Blasi F, Wiedemann LM, Krumlauf R. 2007. Expression of *Hoxa2* in  
1160 rhombomere 4 is regulated by a conserved cross-regulatory mechanism dependent upon *Hoxb1*.  
1161 *Dev Biol* **302**: 646-660.
- 1162 Tümpel S, Cambronero F, Wiedemann LM, Krumlauf R. 2006. Evolution of *cis* elements in the differential  
1163 expression of two *Hoxa2* coparalogous genes in pufferfish (*Takifugu rubripes*). *Proc Natl Acad Sci*  
1164 *U S A* **103**: 5419-5424.

- 1165 Vieux-Rochas M, Mascrez B, Krumlauf R, Duboule D. 2013. Combined function of HoxA and HoxB  
1166 clusters in neural crest cells. *Dev Biol* **382**: 293-301.
- 1167 Watt KEN, Neben CL, Hall S, Merrill AE, Trainor PA. 2018. tp53-dependent and independent signaling  
1168 underlies the pathogenesis and possible prevention of Acrofacial Dysostosis-Cincinnati type.  
1169 *Hum Mol Genet* **27**: 2628-2643.
- 1170 Weaver KN, Watt KE, Hufnagel RB, Navajas Acedo J, Linscott LL, Sund KL, Bender PL, Konig R, Lourenco  
1171 CM, Hehr U et al. 2015. Acrofacial Dysostosis, Cincinnati Type, a Mandibulofacial Dysostosis  
1172 Syndrome with Limb Anomalies, Is Caused by POLR1A Dysfunction. *Am J Hum Genet* **96**: 765-  
1173 774.
- 1174 Xu J, Liu H, Lan Y, Adam M, Clouthier DE, Potter S, Jiang R. 2019. Hedgehog signaling patterns the oral-  
1175 aboral axis of the mandibular arch. *Elife* **8**.
- 1176
- 1177
- 1178
- 1179
